# Supplementary material for: Estimates of Social Contact in a Middle School Based on Self-Report and Wireless Sensor Data
Source: PLoS One. 2016 Apr 21;11(4):e0153690. doi: 10.1371/journal.pone.0153690 (PMC4839567; doi:10.1371/journal.pone.0153690)
Supplement: S2 Dataset — (CSV) [file pone.0153690.s002.csv]

id1	id2	startTime	interval
2003	2006	2369	1
2003	2008	2219	1
2003	2011	1575	1
2003	2011	1579	1
2003	2011	1581	1
2003	2011	1583	1
2003	2017	1812	4
2003	2017	1836	1
2003	2024	2042	2
2003	2041	1570	1
2003	2041	1584	1
2003	2041	1592	1
2003	2041	1594	1
2003	2041	1603	1
2003	2041	1630	1
2003	2041	1632	2
2003	2041	1635	2
2003	2041	1708	1
2003	2061	1719	1
2003	2061	1869	1
2003	2061	1871	1
2003	2065	1571	1
2003	2065	1578	2
2003	2065	1591	4
2003	2065	1597	2
2003	2065	1601	1
2003	2065	1603	1
2003	2065	1606	2
2003	2065	1610	1
2003	2065	1630	1
2003	2065	1632	2
2003	2065	1635	3
2003	2065	1647	1
2003	2065	1654	1
2003	2065	1662	1
2003	2065	1679	2
2003	2065	1682	1
2003	2065	1687	1
2003	2065	1689	1
2003	2065	1691	2
2003	2065	1695	1
2003	2065	1697	1
2003	2065	1700	1
2003	2065	1702	7
2003	2071	1719	1
2003	2071	1722	1
2003	2071	1880	1
2003	2072	1780	1
2003	2072	1783	2
2003	2072	2224	1
2003	2072	2650	1
2003	2072	2723	1
2003	2072	2736	1
2003	2072	2744	1
2003	2072	2770	4
2003	2072	2775	2
2003	2072	2778	2
2003	2075	1728	1
2003	2075	1736	1
2003	2075	1849	1
2003	2077	2005	1
2003	2077	2505	1
2003	2078	1830	1
2003	2078	1832	1
2003	2078	1836	1
2003	2078	1852	1
2003	2089	1579	2
2003	2089	1603	1
2003	2089	1608	1
2003	2089	1638	1
2003	2089	1683	1
2003	2089	1706	1
2003	2089	1708	1
2003	2089	2221	1
2003	2089	2223	1
2003	2096	2504	1
2003	2097	1719	2
2003	2097	1853	1
2003	2098	2234	2
2003	2098	2238	1
2003	2098	2240	1
2003	2099	2503	1
2003	2105	1580	1
2003	2105	1583	2
2003	2105	1597	1
2003	2105	1602	2
2003	2105	1608	1
2003	2105	1630	1
2003	2105	1632	4
2003	2105	1637	1
2003	2105	1679	2
2003	2105	1703	1
2003	2105	1708	1
2003	2111	2222	1
2003	2112	2313	1
2003	2112	2746	1
2003	2112	2748	1
2003	2112	2753	1
2003	2112	2771	2
2003	2112	2778	1
2003	2131	2703	2
2003	2143	1711	1
2003	2147	2676	1
2003	2147	2725	1
2003	2155	1709	1
2003	2170	2358	1
2003	2170	2365	1
2003	2177	1704	1
2003	2180	1722	1
2003	2182	2268	1
2003	2185	2227	1
2003	2185	2229	1
2003	2185	2237	1
2003	2185	2483	1
2003	2190	1883	1
2003	2199	1896	2
2003	2199	1899	2
2003	2199	1905	1
2003	2199	1915	1
2003	2199	1921	1
2003	2199	1939	1
2003	2199	1994	1
2003	2199	1996	1
2003	2199	2001	2
2003	2199	2040	1
2003	2199	2042	1
2003	2199	2099	2
2003	2199	2104	3
2003	2199	2113	1
2003	2199	2117	1
2003	2199	2122	2
2003	2199	2125	1
2003	2199	2130	1
2003	2199	2132	1
2003	2199	2146	2
2003	2199	2175	1
2003	2199	2201	1
2003	2199	2203	1
2003	2199	2205	2
2003	2199	2213	3
2003	2201	1720	1
2003	2212	2033	1
2003	2212	2224	1
2003	2212	2321	1
2003	2212	2330	1
2003	2212	2354	2
2003	2212	2358	3
2003	2212	2368	1
2003	2212	2381	1
2003	2212	2394	6
2003	2212	2413	1
2003	2212	2415	3
2003	2212	2419	4
2003	2212	2440	2
2003	2212	2446	2
2003	2212	2457	5
2003	2212	2467	1
2003	2212	2471	1
2003	2212	2477	1
2003	2218	1880	1
2003	2227	1603	1
2003	2227	1703	2
2003	2228	2317	1
2003	2228	2371	1
2003	2228	2374	1
2003	2232	2218	1
2003	2238	1736	1
2003	2238	2703	1
2003	2238	2767	1
2003	2238	2769	1
2003	2240	1812	1
2003	2240	1814	1
2003	2240	1817	1
2003	2240	1821	1
2003	2240	1850	1
2003	2240	1866	1
2003	2256	1741	1
2003	2265	1579	1
2003	2265	1581	1
2003	2274	1858	1
2003	2275	2336	1
2003	2275	2355	1
2003	2275	2367	2
2003	2275	2682	1
2003	2275	2685	2
2003	2275	2703	1
2003	2282	1883	1
2003	2310	2057	1
2003	2321	2649	1
2003	2326	1544	1
2003	2326	1562	1
2003	2326	1883	1
2003	2331	2478	1
2003	2335	2099	1
2003	2335	2231	2
2003	2335	2234	1
2003	2335	2239	2
2003	2336	2217	1
2003	2336	2222	1
2003	2338	2489	1
2003	2343	2669	2
2003	2343	2681	2
2003	2343	2685	1
2003	2343	2691	1
2003	2343	2693	1
2003	2343	2698	1
2003	2343	2711	1
2003	2343	2722	1
2003	2343	2726	1
2003	2343	2732	1
2003	2343	2734	1
2003	2343	2757	1
2003	2343	2770	4
2003	2343	2781	1
2003	2344	2283	1
2003	2344	2306	1
2003	2344	2496	1
2003	2344	2503	4
2003	2344	2568	2
2003	2344	2617	1
2003	2347	1710	1
2003	2347	2269	1
2003	2347	2278	2
2003	2347	2628	4
2003	2348	2312	2
2003	2351	2577	1
2003	2362	2048	1
2003	2362	2124	1
2003	2362	2126	1
2003	2362	2214	1
2003	2362	2216	1
2003	2363	2688	1
2003	2363	2705	2
2003	2363	2733	1
2003	2370	2505	1
2003	2370	2509	3
2003	2370	2574	1
2003	2370	2633	1
2003	2370	2648	1
2003	2372	1562	1
2003	2376	2208	1
2003	2407	2220	1
2003	2408	2699	1
2003	2408	2704	1
2003	2408	2769	1
2003	2413	2485	1
2003	2419	1735	1
2003	2419	1741	1
2003	2419	1873	1
2003	2419	2312	1
2003	2423	2263	1
2003	2423	2309	1
2003	2425	1880	1
2003	2425	1882	1
2003	2427	2301	2
2003	2446	2572	1
2003	2446	2613	1
2003	2446	2633	1
2003	2451	2349	1
2003	2451	2351	1
2003	2451	2362	3
2003	2451	2366	2
2003	2451	2370	1
2003	2451	2373	9
2003	2451	2434	2
2003	2451	2442	2
2003	2451	2456	5
2003	2451	2462	1
2003	2451	2472	1
2003	2451	2474	1
2003	2451	2476	1
2003	2457	1724	1
2003	2463	2478	1
2003	2475	2517	1
2003	2475	2636	1
2003	2478	2313	1
2003	2483	2252	1
2003	2487	1541	1
2003	2488	2268	1
2003	2494	2633	1
2003	2495	2317	2
2003	2495	2321	1
2003	2495	2325	2
2003	2495	2328	1
2003	2495	2331	1
2003	2495	2339	1
2003	2495	2343	1
2003	2495	2351	1
2003	2495	2361	1
2003	2495	2366	2
2003	2495	2371	1
2003	2495	2373	1
2003	2495	2382	1
2003	2495	2384	1
2003	2495	2386	2
2003	2495	2391	3
2003	2495	2397	4
2003	2495	2404	3
2003	2495	2408	8
2003	2495	2422	1
2003	2495	2424	1
2003	2495	2428	6
2003	2495	2435	2
2003	2495	2438	11
2003	2495	2450	16
2003	2495	2468	2
2003	2495	2472	5
2003	2523	2243	1
2003	2523	2255	2
2003	2527	2273	1
2003	2527	2280	1
2003	2527	2287	1
2003	2541	2222	1
2003	2543	2238	1
2003	2543	2481	1
2003	2545	1575	1
2003	2545	1577	1
2003	2545	1588	1
2003	2545	1605	1
2003	2545	1609	1
2003	2545	1636	1
2003	2549	2699	1
2003	2549	2725	1
2003	2549	2769	1
2003	2558	2495	1
2003	2558	2506	4
2003	2558	2512	2
2003	2558	2516	1
2003	2558	2519	2
2003	2558	2529	2
2003	2558	2582	1
2003	2558	2587	3
2003	2558	2597	1
2003	2558	2599	6
2003	2558	2608	2
2003	2558	2614	2
2003	2558	2621	1
2003	2560	1727	1
2003	2560	1877	1
2003	2560	2224	1
2003	2561	2650	1
2003	2565	1536	1
2003	2565	1559	3
2003	2565	1569	1
2003	2565	1605	1
2003	2565	1702	4
2003	2565	1707	1
2003	2565	1737	2
2003	2565	1742	1
2003	2569	1713	1
2003	2569	1744	1
2003	2569	1787	1
2003	2569	1789	3
2003	2569	1869	1
2003	2569	1871	4
2003	2569	1876	1
2003	2569	2241	9
2003	2569	2251	12
2003	2569	2264	2
2003	2569	2281	1
2003	2569	2283	6
2003	2569	2301	2
2003	2569	2310	1
2003	2569	2481	2
2003	2569	2485	1
2003	2569	2492	6
2003	2569	2503	1
2003	2569	2505	9
2003	2569	2519	2
2003	2569	2522	1
2003	2569	2524	1
2003	2569	2526	1
2003	2569	2528	6
2003	2569	2572	2
2003	2569	2575	2
2003	2569	2579	2
2003	2569	2582	1
2003	2569	2584	4
2003	2569	2590	4
2003	2569	2595	1
2003	2569	2599	7
2003	2569	2607	1
2003	2569	2609	6
2003	2569	2616	4
2003	2569	2621	1
2003	2569	2624	2
2003	2569	2627	1
2003	2569	2635	2
2003	2569	2638	5
2003	2574	2280	2
2003	2593	2738	1
2003	2613	2261	1
2003	2613	2301	1
2003	2613	2303	5
2003	2613	2584	1
2003	2616	1634	1
2003	2617	2312	1
2003	2621	1668	1
2003	2621	1687	1
2003	2622	1538	1
2003	2622	1548	2
2003	2622	1578	1
2003	2622	1703	1
2003	2626	1581	1
2003	2626	1583	1
2003	2630	1862	1
2003	2630	1877	1
2003	2630	2432	1
2003	2630	2457	1
2003	2630	2736	2
2003	2630	2767	1
2003	2630	2782	1
2003	2636	1587	1
2003	2636	1589	1
2003	2636	1597	3
2003	2636	1603	6
2003	2642	1876	1
2003	2642	2638	1
2003	2663	1578	1
2003	2663	1630	1
2003	2663	1680	1
2003	2666	2489	1
2003	2666	2644	1
2003	2676	2258	1
2003	2682	1579	3
2003	2682	1583	1
2003	2682	1986	1
2003	2682	2043	1
2003	2682	2110	1
2003	2682	2160	1
2003	2687	1579	2
2003	2687	1582	2
2003	2687	1632	1
2003	2688	2310	1
2003	2698	2484	2
2003	2698	2487	1
2003	2699	2669	1
2003	2699	2771	1
2003	2699	2781	1
2003	3012	2335	1
2003	3012	2347	2
2003	3012	2352	1
2003	3012	2358	1
2003	3012	2362	4
2003	3012	2370	1
2003	3012	2375	1
2003	3012	2377	1
2003	3012	2379	2
2003	3012	2383	1
2003	3012	2393	1
2003	3012	2463	3
2003	3012	2476	1
2003	3013	1741	1
2003	3013	1800	1
2003	3013	1805	1
2003	3013	1861	1
2003	3013	2104	5
2003	3013	2322	1
2003	3013	2325	2
2003	3013	2349	5
2003	3013	2365	2
2003	3013	2368	1
2003	3013	2385	1
2003	3013	2393	2
2003	3013	2398	1
2003	3013	2400	4
2003	3013	2407	11
2003	3013	2421	6
2003	3013	2428	14
2003	3013	2446	6
2003	3013	2453	19
2003	3013	2475	3
2003	3020	1737	1
2003	3020	2261	1
2003	3020	2312	1
2003	3022	1962	1
2003	3022	2102	2
2003	3022	2201	2
2003	3022	2204	1
2003	3022	2206	1
2003	3022	2211	1
2003	3022	2213	3
2003	3023	1793	1
2003	3023	1801	1
2003	3023	1807	1
2003	3023	1814	1
2003	3023	1820	1
2003	3023	1833	2
2003	3023	1839	2
2003	3023	1848	1
2003	3023	1853	1
2003	3023	1855	1
2003	3023	1857	1
2003	3025	1880	1
2003	3026	1741	1
2003	3026	2285	1
2003	3026	2298	1
2003	3026	2302	1
2003	3026	2503	1
2003	3026	2505	3
2003	3026	2522	1
2003	3026	2569	1
2003	3026	2572	1
2003	3026	2575	1
2003	3026	2613	1
2003	3029	1718	1
2003	3029	1720	3
2003	3029	1724	1
2003	3029	1726	3
2003	3029	1737	7
2003	3029	1800	3
2003	3029	1805	4
2003	3029	1814	1
2003	3029	1818	2
2003	3029	1822	1
2003	3029	1828	3
2003	3029	1833	4
2003	3029	1838	1
2003	3029	1840	1
2003	3029	1846	2
2003	3029	1850	6
2003	3029	1863	1
2003	3029	1876	1
2003	3029	2653	2
2003	3029	2663	1
2003	3029	2707	1
2003	3032	2243	2
2003	3032	2254	4
2003	3042	1735	1
2003	3045	1801	1
2003	3045	1809	1
2003	3045	1812	1
2003	3045	1815	1
2003	3045	1821	1
2003	3045	1823	1
2003	3045	1840	1
2003	3045	1851	1
2003	3059	2660	1
2003	3059	2667	1
2003	3059	2707	1
2003	3066	2224	1
2003	3073	2462	1
2003	3073	2472	1
2003	3074	2221	1
2003	3077	1895	1
2003	3077	1897	1
2003	3077	1901	1
2003	3077	1904	2
2003	3077	1910	1
2003	3077	1912	1
2003	3077	1917	2
2003	3077	1924	1
2003	3077	1935	3
2003	3077	1955	1
2003	3077	1957	1
2003	3077	1964	5
2003	3077	1970	1
2003	3077	2036	1
2003	3077	2162	2
2003	3077	2199	1
2003	3087	2662	1
2003	3087	2668	1
2003	3087	2736	1
2003	3090	1721	1
2003	3090	1871	1
2003	3090	1873	3
2003	3095	2221	1
2003	3103	2116	3
2003	3103	2121	2
2003	3103	2124	3
2003	3109	2738	1
2003	3111	2745	1
2003	3111	2769	1
2003	3116	2580	1
2003	3120	2210	1
2003	3130	2221	3
2003	3130	2656	2
2003	3130	2781	1
2003	3145	2711	1
2003	3145	2734	1
2003	3145	2738	1
2003	3145	2768	1
2003	3146	1887	1
2003	3146	1891	1
2003	3157	1880	1
2003	3163	1735	1
2003	3163	2767	1
2003	3165	1711	1
2003	3168	2651	1
2003	3168	2734	1
2003	3168	2770	3
2003	3168	2775	1
2003	3169	2313	1
2003	3169	2504	2
2003	3169	2537	1
2003	3169	2539	2
2003	3169	2542	1
2003	3169	2544	1
2003	3169	2548	1
2003	3169	2550	3
2003	3169	2573	1
2003	3169	2580	2
2003	3171	1991	1
2003	3171	2003	4
2003	3171	2211	1
2003	3179	1899	1
2003	3179	2210	1
2003	3183	2706	1
2003	3183	2770	1
2003	3183	2774	1
2003	3184	2484	2
2003	3184	2639	1
2003	3188	2692	1
2003	3196	2047	1
2003	3196	2207	1
2003	3201	2020	1
2003	3203	2047	1
2003	3213	1804	2
2003	3213	1844	1
2003	3216	2278	1
2003	3216	2300	1
2003	3216	2305	1
2003	3221	2699	1
2003	3221	2746	22
2003	3221	2769	1
2003	3221	2772	4
2003	3227	2311	1
2003	3233	2479	1
2003	3253	2504	1
2003	3255	2117	1
2003	3255	2211	1
2003	3256	2205	1
2003	3256	2214	2
2003	3259	1721	1
2003	3259	2312	1
2003	3259	2720	1
2003	3259	2769	1
2003	3261	1718	3
2003	3261	1871	1
2003	3261	2723	1
2003	3261	2731	1
2003	3261	2764	4
2003	3269	2051	1
2003	3270	2054	1
2003	3276	2694	1
2003	3276	2715	1
2003	3276	2720	1
2003	3283	2050	3
2003	3288	2313	1
2003	3288	2672	1
2003	3288	2675	2
2003	3288	2681	3
2003	3288	2685	1
2003	3288	2687	2
2003	3288	2691	1
2003	3288	2694	1
2003	3288	2699	5
2003	3288	2705	2
2003	3288	2710	1
2003	3288	2721	1
2003	3293	2313	1
2003	3342	2138	1
2003	3342	2213	2
2003	3347	1889	1
2003	3347	1915	1
2003	3347	2058	1
2003	3347	2117	1
2003	3350	2021	1
2003	3350	2057	1
2003	3350	2270	2
2003	3350	2278	1
2003	3350	2282	2
2003	3350	2312	1
2003	3350	2505	3
2003	3350	2572	1
2003	3368	2284	1
2003	3368	2304	1
2003	3368	2505	2
2003	3368	2510	2
2003	3368	2513	1
2003	3368	2515	2
2003	3368	2527	7
2003	3368	2612	1
2003	3371	2217	1
2003	3371	2270	1
2003	3371	2301	1
2003	3371	2505	1
2003	3371	2509	1
2003	3371	2533	1
2003	3371	2540	1
2003	3371	2543	1
2003	3371	2548	1
2003	3371	2624	1
2003	3376	2485	1
2003	3380	2313	1
2003	3380	2650	1
2003	3381	2231	1
2003	3386	1801	1
2003	3386	1814	1
2003	3386	1818	1
2003	3386	1820	3
2003	3386	1825	1
2003	3386	1832	3
2003	3386	1841	2
2003	3386	1854	1
2003	3386	1860	1
2003	3386	1870	2
2003	3386	1873	3
2003	3392	2299	1
2003	3393	1864	1
2003	3397	2241	1
2003	3401	2315	1
2003	3404	2770	1
2003	3404	2773	1
2003	3404	2775	1
2003	3417	2769	1
2003	3420	1889	1
2003	3420	1891	2
2003	3420	1894	1
2003	3420	1896	1
2003	3420	1904	2
2003	3420	1908	1
2003	3420	1910	4
2003	3420	1916	1
2003	3420	1920	1
2003	3420	1923	1
2003	3420	1928	2
2003	3420	1936	1
2003	3420	1941	1
2003	3420	1952	1
2003	3420	1956	1
2003	3420	1958	5
2003	3420	1964	2
2003	3420	1967	2
2003	3420	1970	1
2003	3420	1975	2
2003	3420	1978	1
2003	3420	1981	1
2003	3420	1983	2
2003	3420	1992	5
2003	3420	2003	1
2003	3420	2023	1
2003	3420	2043	1
2003	3420	2047	1
2003	3420	2060	1
2003	3420	2063	1
2003	3420	2065	4
2003	3420	2071	5
2003	3420	2077	2
2003	3420	2086	7
2003	3420	2097	1
2003	3420	2100	2
2003	3420	2103	5
2003	3420	2109	4
2003	3420	2115	2
2003	3420	2130	1
2003	3420	2142	1
2003	3420	2146	2
2003	3420	2149	1
2003	3420	2151	3
2003	3420	2155	1
2003	3420	2158	1
2003	3420	2160	1
2003	3420	2173	2
2003	3420	2200	1
2003	3420	2202	1
2003	3420	2208	2
2003	3420	2211	1
2003	3420	2214	1
2003	3420	2225	2
2003	3420	2232	1
2003	3420	2235	3
2003	3423	2261	1
2003	3434	2036	1
2003	3434	2087	2
2003	3434	2158	1
2003	3434	2165	1
2003	3434	2210	1
2003	3434	2212	2
2003	3434	2219	1
2004	2006	1877	2
2004	2008	2233	1
2004	2008	2240	1
2004	2009	2308	1
2004	2010	2149	1
2004	2010	2154	2
2004	2010	2164	2
2004	2010	2172	1
2004	2011	2648	2
2004	2028	1630	3
2004	2028	1641	1
2004	2028	1650	1
2004	2028	1657	1
2004	2028	1659	2
2004	2028	1671	1
2004	2028	1679	1
2004	2028	1681	1
2004	2028	1685	1
2004	2028	1690	1
2004	2028	1693	2
2004	2028	1698	1
2004	2028	1700	1
2004	2028	1702	6
2004	2028	1722	1
2004	2028	1724	1
2004	2028	1727	1
2004	2028	1729	3
2004	2028	1733	4
2004	2028	1739	1
2004	2028	1751	1
2004	2028	1755	1
2004	2028	1767	1
2004	2028	1775	1
2004	2028	1793	1
2004	2028	1800	2
2004	2028	1803	1
2004	2034	2312	1
2004	2041	2048	1
2004	2047	2247	1
2004	2047	2254	1
2004	2048	1941	1
2004	2048	1944	1
2004	2048	1969	1
2004	2048	2009	1
2004	2048	2027	1
2004	2048	2103	1
2004	2048	2136	1
2004	2048	2145	1
2004	2048	2149	1
2004	2048	2161	1
2004	2048	2212	2
2004	2048	2218	1
2004	2048	2220	1
2004	2048	2312	1
2004	2058	1882	1
2004	2060	2315	1
2004	2062	1711	1
2004	2072	2483	1
2004	2076	1668	1
2004	2076	1680	2
2004	2076	1687	1
2004	2077	1715	1
2004	2077	1881	1
2004	2077	2309	1
2004	2077	2651	1
2004	2077	2688	1
2004	2078	2488	1
2004	2080	2591	1
2004	2080	2593	1
2004	2080	2614	1
2004	2081	2312	1
2004	2081	2330	1
2004	2081	2361	1
2004	2081	2522	1
2004	2087	2049	1
2004	2088	2063	1
2004	2088	2069	2
2004	2088	2073	5
2004	2088	2084	2
2004	2088	2089	6
2004	2088	2105	1
2004	2088	2129	2
2004	2088	2151	1
2004	2088	2157	1
2004	2088	2168	1
2004	2088	2172	3
2004	2088	2179	1
2004	2088	2186	3
2004	2088	2203	1
2004	2088	2228	3
2004	2088	2232	2
2004	2088	2247	1
2004	2088	2249	3
2004	2088	2254	1
2004	2088	2257	1
2004	2093	2021	1
2004	2095	2222	1
2004	2097	1884	1
2004	2099	1640	1
2004	2099	1642	1
2004	2099	1644	1
2004	2099	1649	1
2004	2099	1662	3
2004	2099	1673	2
2004	2099	1676	3
2004	2099	1681	2
2004	2099	1689	1
2004	2099	1692	1
2004	2099	1694	1
2004	2099	1696	1
2004	2099	1698	1
2004	2099	1728	1
2004	2099	1745	1
2004	2099	1755	1
2004	2099	1789	2
2004	2099	1792	1
2004	2099	1794	3
2004	2099	1805	1
2004	2099	1884	1
2004	2099	1890	1
2004	2099	1897	1
2004	2099	1899	2
2004	2099	1902	1
2004	2099	2397	1
2004	2099	2424	2
2004	2099	2432	1
2004	2099	2445	1
2004	2099	2463	2
2004	2099	2478	2
2004	2117	2249	1
2004	2117	2265	1
2004	2117	2267	15
2004	2117	2283	7
2004	2117	2292	2
2004	2117	2313	2
2004	2117	2649	1
2004	2117	2652	1
2004	2131	1665	1
2004	2131	1677	1
2004	2131	1680	1
2004	2131	1691	1
2004	2131	1792	1
2004	2131	1803	1
2004	2131	1880	1
2004	2141	1711	1
2004	2141	2234	3
2004	2141	2240	1
2004	2141	2247	4
2004	2141	2255	1
2004	2141	2257	2
2004	2145	1635	1
2004	2145	1877	1
2004	2145	1898	2
2004	2149	2130	2
2004	2149	2133	1
2004	2149	2144	1
2004	2149	2166	1
2004	2153	1888	1
2004	2153	2655	1
2004	2157	1661	1
2004	2157	1802	1
2004	2159	2506	1
2004	2159	2598	1
2004	2164	2540	1
2004	2164	2542	4
2004	2164	2586	2
2004	2164	2589	1
2004	2164	2593	1
2004	2164	2598	3
2004	2164	2602	1
2004	2164	2606	41
2004	2169	2220	1
2004	2170	1882	1
2004	2173	1884	1
2004	2173	2481	1
2004	2182	2071	2
2004	2182	2151	1
2004	2182	2217	1
2004	2185	2306	1
2004	2193	2605	1
2004	2197	2313	1
2004	2202	2252	2
2004	2205	2560	3
2004	2205	2564	20
2004	2205	2595	1
2004	2218	2301	1
2004	2228	1797	1
2004	2228	1875	1
2004	2228	1878	1
2004	2228	2480	1
2004	2230	2483	1
2004	2232	1713	1
2004	2237	2054	1
2004	2238	2312	1
2004	2251	2311	1
2004	2251	2480	1
2004	2255	1637	1
2004	2255	1674	2
2004	2255	1694	1
2004	2255	1764	1
2004	2255	1791	2
2004	2255	1800	1
2004	2255	1803	2
2004	2255	1875	4
2004	2255	2489	1
2004	2256	1714	1
2004	2256	2314	1
2004	2257	1891	2
2004	2257	1895	1
2004	2257	1897	1
2004	2257	1899	2
2004	2257	1902	1
2004	2257	1907	7
2004	2257	1915	2
2004	2257	1919	2
2004	2257	1939	2
2004	2257	1950	1
2004	2257	1953	1
2004	2257	1955	3
2004	2257	1960	2
2004	2257	1963	4
2004	2257	1970	16
2004	2257	1987	1
2004	2257	1990	1
2004	2257	1993	1
2004	2257	1997	31
2004	2257	2029	2
2004	2257	2037	10
2004	2268	2289	1
2004	2274	2326	1
2004	2274	2343	1
2004	2274	2347	1
2004	2274	2351	4
2004	2274	2357	1
2004	2274	2361	1
2004	2274	2376	1
2004	2274	2389	4
2004	2274	2395	2
2004	2274	2417	2
2004	2274	2425	11
2004	2274	2444	1
2004	2274	2448	13
2004	2274	2462	1
2004	2274	2480	1
2004	2274	2653	1
2004	2275	1652	2
2004	2275	1667	1
2004	2275	1747	1
2004	2275	1751	1
2004	2275	1768	1
2004	2275	1774	1
2004	2275	1790	2
2004	2275	1793	1
2004	2275	1804	1
2004	2275	2225	1
2004	2275	2480	1
2004	2276	1653	1
2004	2277	2506	5
2004	2279	1893	11
2004	2279	1918	1
2004	2279	1921	1
2004	2279	1923	1
2004	2279	1946	1
2004	2279	1949	1
2004	2279	1967	1
2004	2279	1969	1
2004	2279	1972	2
2004	2279	1976	1
2004	2279	1986	1
2004	2279	1990	1
2004	2279	1993	1
2004	2279	1995	1
2004	2279	1997	6
2004	2279	2004	1
2004	2279	2018	3
2004	2279	2037	1
2004	2279	2039	1
2004	2279	2047	1
2004	2279	2103	1
2004	2279	2111	1
2004	2279	2124	1
2004	2279	2129	1
2004	2279	2136	1
2004	2279	2158	1
2004	2279	2180	1
2004	2279	2193	1
2004	2282	1715	1
2004	2287	2096	1
2004	2287	2105	1
2004	2287	2115	1
2004	2287	2119	1
2004	2287	2160	1
2004	2287	2173	1
2004	2287	2178	1
2004	2287	2217	1
2004	2287	2229	1
2004	2287	2411	1
2004	2287	2479	1
2004	2294	2065	1
2004	2294	2070	2
2004	2294	2076	3
2004	2294	2091	1
2004	2294	2093	3
2004	2294	2106	2
2004	2294	2110	1
2004	2294	2124	1
2004	2294	2168	1
2004	2294	2172	2
2004	2294	2190	1
2004	2294	2194	1
2004	2294	2214	1
2004	2294	2217	1
2004	2294	2219	2
2004	2294	2222	3
2004	2294	2228	3
2004	2294	2232	3
2004	2294	2236	3
2004	2294	2241	2
2004	2294	2244	1
2004	2294	2249	7
2004	2294	2258	2
2004	2294	2261	2
2004	2294	2264	1
2004	2294	2320	1
2004	2294	2488	2
2004	2294	2595	1
2004	2294	2655	1
2004	2297	2484	1
2004	2299	2652	1
2004	2305	2222	1
2004	2311	1890	1
2004	2311	1893	1
2004	2311	1973	2
2004	2314	2108	1
2004	2314	2217	1
2004	2324	2055	1
2004	2326	1717	1
2004	2333	2506	2
2004	2333	2509	3
2004	2336	2051	1
2004	2347	1644	1
2004	2347	1653	1
2004	2347	1658	1
2004	2347	1670	1
2004	2347	1674	4
2004	2347	1683	1
2004	2347	1687	1
2004	2347	1715	1
2004	2347	1758	1
2004	2347	1765	1
2004	2347	1767	1
2004	2347	1772	1
2004	2347	1778	1
2004	2347	1805	1
2004	2347	1810	1
2004	2347	1814	3
2004	2347	1818	7
2004	2347	1826	7
2004	2347	1834	1
2004	2347	1836	1
2004	2347	1838	1
2004	2347	1841	4
2004	2347	1847	3
2004	2347	1858	2
2004	2347	1867	1
2004	2347	1869	1
2004	2347	1871	1
2004	2347	1876	1
2004	2347	1891	1
2004	2347	1895	2
2004	2347	1898	2
2004	2347	1901	1
2004	2347	1905	1
2004	2347	1908	2
2004	2347	1911	1
2004	2347	1913	2
2004	2347	1916	7
2004	2347	1933	3
2004	2347	1940	2
2004	2347	1952	1
2004	2347	1956	2
2004	2347	1985	1
2004	2347	1989	1
2004	2347	1991	3
2004	2347	1995	4
2004	2347	2003	1
2004	2347	2008	1
2004	2347	2012	5
2004	2347	2019	3
2004	2347	2024	2
2004	2347	2028	1
2004	2347	2032	1
2004	2347	2038	1
2004	2347	2043	4
2004	2347	2411	2
2004	2347	2449	1
2004	2347	2651	1
2004	2348	2525	1
2004	2348	2584	1
2004	2350	1737	2
2004	2350	1772	1
2004	2357	2101	1
2004	2357	2111	1
2004	2357	2113	2
2004	2357	2116	1
2004	2357	2122	1
2004	2357	2124	1
2004	2357	2148	5
2004	2357	2154	1
2004	2357	2159	1
2004	2357	2161	1
2004	2357	2167	1
2004	2357	2185	1
2004	2357	2190	1
2004	2357	2199	1
2004	2357	2203	1
2004	2359	1715	1
2004	2363	1668	2
2004	2376	2334	1
2004	2376	2479	1
2004	2380	1639	1
2004	2380	1644	3
2004	2380	1663	1
2004	2380	1684	1
2004	2380	1709	2
2004	2380	1794	2
2004	2380	1809	1
2004	2380	1815	8
2004	2380	1826	11
2004	2380	1839	1
2004	2380	1845	5
2004	2380	1851	19
2004	2380	1871	1
2004	2380	2595	1
2004	2380	2597	1
2004	2380	2627	4
2004	2380	2644	1
2004	2382	2482	1
2004	2391	2596	1
2004	2391	2604	1
2004	2392	2310	1
2004	2395	2647	1
2004	2400	1669	1
2004	2400	1794	1
2004	2400	1877	2
2004	2400	1884	1
2004	2400	1976	1
2004	2400	2047	2
2004	2400	2606	1
2004	2400	2608	1
2004	2400	2627	1
2004	2402	2289	2
2004	2402	2649	1
2004	2403	2484	1
2004	2408	1634	3
2004	2408	1649	7
2004	2408	1658	5
2004	2408	1664	3
2004	2408	1673	2
2004	2408	1678	2
2004	2408	1687	2
2004	2408	1690	1
2004	2408	1695	1
2004	2408	1698	1
2004	2408	1700	10
2004	2408	1721	1
2004	2408	1723	1
2004	2408	1727	1
2004	2408	1729	2
2004	2408	1733	18
2004	2408	1752	1
2004	2408	1755	10
2004	2408	1766	3
2004	2408	1770	2
2004	2408	1773	1
2004	2408	1810	1
2004	2412	1882	1
2004	2419	2311	1
2004	2426	2316	1
2004	2433	1881	1
2004	2433	2055	1
2004	2451	2648	1
2004	2452	1890	1
2004	2452	1892	2
2004	2452	1895	1
2004	2452	1897	2
2004	2452	1902	1
2004	2452	1912	1
2004	2452	1987	2
2004	2452	2020	1
2004	2452	2048	1
2004	2461	2659	1
2004	2461	2667	1
2004	2461	2669	5
2004	2461	2675	1
2004	2461	2686	1
2004	2461	2690	1
2004	2461	2695	1
2004	2461	2730	1
2004	2461	2737	1
2004	2461	2740	2
2004	2461	2756	1
2004	2461	2758	1
2004	2475	2052	1
2004	2475	2055	3
2004	2476	2482	2
2004	2487	2050	2
2004	2495	1656	2
2004	2495	1675	1
2004	2495	1680	1
2004	2495	1766	4
2004	2495	1799	1
2004	2495	1803	1
2004	2495	1880	1
2004	2496	1885	1
2004	2497	2057	1
2004	2500	2321	1
2004	2504	2480	1
2004	2522	1714	1
2004	2522	1886	2
2004	2530	2586	1
2004	2530	2590	1
2004	2530	2592	1
2004	2530	2598	1
2004	2530	2608	39
2004	2535	2107	1
2004	2535	2147	2
2004	2535	2159	1
2004	2535	2196	1
2004	2535	2201	1
2004	2535	2482	2
2004	2535	2666	1
2004	2535	2668	8
2004	2535	2677	4
2004	2542	2106	1
2004	2542	2110	1
2004	2542	2228	5
2004	2542	2235	1
2004	2542	2254	1
2004	2542	2284	2
2004	2542	2666	2
2004	2542	2670	3
2004	2542	2680	1
2004	2542	2690	1
2004	2542	2700	1
2004	2542	2718	3
2004	2545	2050	1
2004	2547	2264	2
2004	2547	2484	1
2004	2562	2654	1
2004	2563	2230	2
2004	2563	2239	1
2004	2563	2257	1
2004	2577	2259	1
2004	2577	2262	1
2004	2584	2316	1
2004	2594	1891	2
2004	2594	1895	2
2004	2594	1898	6
2004	2594	1905	8
2004	2594	1914	1
2004	2594	1918	1
2004	2594	1937	1
2004	2594	1947	1
2004	2594	1949	12
2004	2594	1962	3
2004	2594	1966	3
2004	2594	1971	2
2004	2594	1974	5
2004	2594	1980	10
2004	2594	1992	1
2004	2594	1996	1
2004	2594	1998	6
2004	2594	2005	21
2004	2594	2028	1
2004	2594	2032	1
2004	2594	2035	1
2004	2594	2037	1
2004	2594	2040	2
2004	2594	2046	2
2004	2602	2490	1
2004	2602	2585	1
2004	2602	2595	1
2004	2602	2646	1
2004	2603	1655	1
2004	2603	1710	1
2004	2603	1713	1
2004	2603	1717	1
2004	2603	1719	1
2004	2603	1789	1
2004	2603	1796	2
2004	2603	1835	1
2004	2603	1841	1
2004	2603	1868	1
2004	2603	1876	2
2004	2603	1890	1
2004	2603	1897	1
2004	2603	1902	1
2004	2603	2060	7
2004	2603	2168	1
2004	2603	2171	1
2004	2603	2216	1
2004	2603	2220	1
2004	2603	2232	1
2004	2603	2247	1
2004	2603	2253	1
2004	2603	2255	1
2004	2603	2263	1
2004	2603	2321	1
2004	2603	2457	1
2004	2603	2594	2
2004	2603	2655	1
2004	2606	2507	1
2004	2606	2596	1
2004	2607	1900	1
2004	2607	2114	1
2004	2607	2117	1
2004	2607	2121	1
2004	2607	2124	1
2004	2607	2132	1
2004	2607	2147	1
2004	2607	2173	1
2004	2607	2186	2
2004	2607	2197	1
2004	2612	2483	1
2004	2616	2483	1
2004	2620	2048	1
2004	2627	2219	1
2004	2632	1872	1
2004	2632	2071	1
2004	2632	2108	1
2004	2655	2222	1
2004	2660	2219	1
2004	2661	1889	1
2004	2661	2101	1
2004	2661	2103	1
2004	2661	2110	1
2004	2661	2127	1
2004	2661	2154	1
2004	2661	2160	2
2004	2661	2164	1
2004	2661	2170	2
2004	2661	2209	1
2004	2661	2216	1
2004	2680	2054	1
2004	2682	2312	1
2004	2687	1880	1
2004	2687	2311	1
2004	2689	2057	1
2004	2695	2479	4
2004	2697	2289	1
2004	3003	1884	1
2004	3003	2096	1
2004	3003	2098	2
2004	3003	2101	1
2004	3003	2105	1
2004	3003	2114	3
2004	3003	2119	2
2004	3003	2122	1
2004	3003	2124	1
2004	3003	2127	3
2004	3003	2131	3
2004	3003	2135	3
2004	3003	2147	3
2004	3003	2161	1
2004	3003	2200	1
2004	3003	2207	1
2004	3003	2214	1
2004	3003	2217	1
2004	3003	2264	1
2004	3003	2482	3
2004	3003	2487	1
2004	3003	2649	2
2004	3014	2482	1
2004	3042	2312	1
2004	3045	2653	1
2004	3050	2056	1
2004	3056	2482	1
2004	3083	1885	1
2004	3084	1895	8
2004	3084	2055	1
2004	3084	2320	1
2004	3084	2479	1
2004	3089	2085	1
2004	3089	2116	1
2004	3089	2123	1
2004	3089	2127	2
2004	3089	2130	1
2004	3089	2132	1
2004	3089	2152	1
2004	3089	2160	1
2004	3089	2165	1
2004	3089	2174	2
2004	3089	2178	3
2004	3089	2201	1
2004	3089	2206	1
2004	3089	2212	1
2004	3090	2311	1
2004	3091	2099	2
2004	3093	2653	1
2004	3097	2227	1
2004	3097	2302	1
2004	3098	2071	1
2004	3098	2149	1
2004	3098	2156	4
2004	3098	2161	1
2004	3098	2166	1
2004	3098	2168	1
2004	3098	2170	3
2004	3098	2174	4
2004	3098	2179	2
2004	3098	2182	1
2004	3098	2184	8
2004	3098	2193	7
2004	3098	2201	1
2004	3098	2203	1
2004	3098	2216	1
2004	3098	2690	1
2004	3103	2483	1
2004	3117	2302	1
2004	3120	2482	1
2004	3123	2302	1
2004	3125	2097	1
2004	3125	2130	1
2004	3125	2146	1
2004	3125	2188	1
2004	3125	2200	1
2004	3125	2214	1
2004	3127	2649	1
2004	3129	2228	1
2004	3130	2054	1
2004	3132	2312	1
2004	3135	2070	1
2004	3135	2096	1
2004	3135	2110	2
2004	3135	2115	2
2004	3135	2130	1
2004	3135	2158	1
2004	3135	2162	1
2004	3135	2165	1
2004	3135	2167	3
2004	3135	2176	1
2004	3135	2179	2
2004	3135	2206	1
2004	3135	2213	1
2004	3135	2217	1
2004	3135	2314	1
2004	3141	2482	1
2004	3145	2302	1
2004	3150	2098	1
2004	3150	2100	3
2004	3150	2105	1
2004	3150	2114	10
2004	3150	2127	3
2004	3150	2133	3
2004	3150	2139	1
2004	3150	2146	1
2004	3150	2150	5
2004	3150	2161	1
2004	3150	2164	1
2004	3150	2177	27
2004	3150	2206	1
2004	3150	2209	6
2004	3150	2216	2
2004	3155	1885	1
2004	3155	2061	11
2004	3155	2073	2
2004	3155	2080	3
2004	3155	2088	7
2004	3155	2112	1
2004	3155	2207	1
2004	3155	2479	2
2004	3158	2649	1
2004	3158	2652	1
2004	3162	1890	1
2004	3162	2311	1
2004	3164	2650	1
2004	3165	2589	5
2004	3165	2595	1
2004	3165	2597	1
2004	3165	2599	1
2004	3165	2601	1
2004	3165	2603	9
2004	3165	2616	1
2004	3165	2619	2
2004	3165	2626	1
2004	3165	2628	3
2004	3172	2311	1
2004	3172	2484	1
2004	3175	2302	1
2004	3177	2310	1
2004	3178	2320	1
2004	3178	2327	1
2004	3178	2331	1
2004	3178	2346	1
2004	3178	2401	7
2004	3178	2410	6
2004	3178	2420	1
2004	3178	2422	1
2004	3178	2435	1
2004	3178	2437	10
2004	3178	2461	1
2004	3178	2468	2
2004	3178	2475	3
2004	3179	2481	1
2004	3182	2484	1
2004	3197	2603	1
2004	3197	2605	1
2004	3203	2222	1
2004	3209	2584	1
2004	3212	2236	1
2004	3212	2240	1
2004	3212	2255	2
2004	3214	2480	1
2004	3216	1715	1
2004	3216	2049	1
2004	3220	2103	1
2004	3220	2129	1
2004	3220	2136	1
2004	3220	2145	1
2004	3220	2148	1
2004	3220	2153	1
2004	3220	2157	1
2004	3223	2072	3
2004	3223	2149	1
2004	3223	2255	2
2004	3223	2258	1
2004	3223	2268	1
2004	3223	2270	1
2004	3225	2050	1
2004	3227	2055	1
2004	3234	2173	1
2004	3234	2175	3
2004	3234	2179	1
2004	3234	2183	1
2004	3234	2203	1
2004	3234	2213	1
2004	3234	2266	2
2004	3240	2048	1
2004	3257	2310	1
2004	3259	2311	1
2004	3266	2057	1
2004	3270	1717	1
2004	3270	2483	1
2004	3274	2054	1
2004	3274	2480	1
2004	3274	2659	31
2004	3274	2691	66
2004	3274	2758	1
2004	3283	2316	1
2004	3285	1881	1
2004	3289	2233	1
2004	3289	2238	1
2004	3289	2254	2
2004	3329	2222	1
2004	3342	2652	1
2004	3347	2652	1
2004	3365	1881	1
2004	3378	1883	1
2004	3385	1652	1
2004	3385	1668	1
2004	3385	1809	1
2004	3385	1831	3
2004	3385	1849	1
2004	3385	1851	1
2004	3385	1856	2
2004	3385	1861	1
2004	3385	2096	1
2004	3385	2099	1
2004	3385	2106	1
2004	3385	2138	1
2004	3385	2320	1
2004	3385	2479	1
2004	3393	2313	1
2004	3400	2224	1
2004	3406	2055	1
2004	3410	2483	2
2004	3413	2310	1
2006	2020	2053	1
2006	2022	1615	1
2006	2022	2071	1
2006	2023	2545	1
2006	2028	1808	1
2006	2028	1811	1
2006	2028	1821	13
2006	2028	1836	13
2006	2028	1852	7
2006	2028	1865	1
2006	2028	1871	2
2006	2028	1895	1
2006	2028	1901	2
2006	2028	1907	2
2006	2028	1969	1
2006	2028	1974	1
2006	2028	1997	1
2006	2028	2030	1
2006	2028	2035	1
2006	2028	2088	1
2006	2028	2090	1
2006	2028	2320	4
2006	2028	2325	8
2006	2028	2334	3
2006	2028	2344	1
2006	2028	2363	2
2006	2028	2371	1
2006	2028	2383	6
2006	2028	2416	1
2006	2028	2418	2
2006	2028	2427	1
2006	2028	2429	1
2006	2028	2439	4
2006	2028	2444	3
2006	2028	2449	1
2006	2028	2453	1
2006	2028	2457	1
2006	2028	2466	2
2006	2028	2479	2
2006	2054	2486	1
2006	2060	2113	1
2006	2076	1683	1
2006	2081	2660	1
2006	2081	2670	1
2006	2081	2683	2
2006	2081	2686	1
2006	2081	2689	5
2006	2081	2697	1
2006	2081	2712	2
2006	2081	2715	3
2006	2081	2723	1
2006	2081	2728	8
2006	2081	2738	2
2006	2081	2741	7
2006	2081	2751	3
2006	2081	2757	4
2006	2081	2762	1
2006	2081	2765	6
2006	2081	2774	1
2006	2081	2776	6
2006	2096	2109	1
2006	2096	2111	1
2006	2096	2113	1
2006	2096	2118	1
2006	2096	2124	1
2006	2097	2143	1
2006	2099	1653	1
2006	2099	2133	2
2006	2105	2140	1
2006	2105	2145	1
2006	2105	2301	1
2006	2112	2652	1
2006	2124	2058	1
2006	2124	2138	1
2006	2124	2162	1
2006	2124	2233	1
2006	2124	2236	3
2006	2124	2244	6
2006	2124	2252	1
2006	2124	2256	1
2006	2125	2101	1
2006	2125	2111	1
2006	2125	2113	1
2006	2125	2115	1
2006	2125	2123	2
2006	2125	2134	1
2006	2125	2650	1
2006	2141	2142	1
2006	2145	1877	2
2006	2153	2029	1
2006	2157	1685	1
2006	2166	2075	1
2006	2170	2320	1
2006	2170	2361	1
2006	2176	2313	1
2006	2177	1716	1
2006	2195	1893	1
2006	2195	2039	3
2006	2195	2043	1
2006	2197	2056	1
2006	2199	2375	1
2006	2199	2389	1
2006	2202	2050	1
2006	2218	2492	3
2006	2218	2496	4
2006	2218	2506	1
2006	2218	2508	2
2006	2218	2514	2
2006	2218	2517	1
2006	2218	2519	1
2006	2218	2543	1
2006	2218	2564	1
2006	2223	2370	1
2006	2228	1612	1
2006	2228	1821	2
2006	2228	1830	1
2006	2228	1832	7
2006	2228	1845	2
2006	2228	1865	1
2006	2228	1873	1
2006	2228	1875	4
2006	2228	1893	1
2006	2228	2369	1
2006	2228	2480	1
2006	2229	2105	1
2006	2229	2114	1
2006	2229	2147	3
2006	2229	2302	1
2006	2233	1951	1
2006	2250	1716	1
2006	2255	1876	2
2006	2255	1882	1
2006	2256	2652	1
2006	2263	1898	1
2006	2263	2038	1
2006	2263	2043	1
2006	2270	2486	1
2006	2274	2654	1
2006	2275	1670	1
2006	2275	2369	1
2006	2275	2479	1
2006	2276	1668	1
2006	2276	1805	1
2006	2276	2317	1
2006	2276	2319	1
2006	2276	2322	1
2006	2276	2342	1
2006	2276	2345	2
2006	2276	2350	11
2006	2276	2369	1
2006	2276	2375	3
2006	2276	2429	1
2006	2276	2447	1
2006	2276	2453	1
2006	2276	2479	1
2006	2287	2052	1
2006	2303	2483	1
2006	2305	1889	1
2006	2305	2005	1
2006	2308	1874	2
2006	2309	2648	1
2006	2310	1894	1
2006	2310	2047	1
2006	2321	1882	1
2006	2324	2026	1
2006	2324	2036	1
2006	2324	2070	1
2006	2324	2534	1
2006	2324	2544	1
2006	2324	2551	1
2006	2324	2557	1
2006	2324	2567	1
2006	2324	2590	3
2006	2324	2594	1
2006	2324	2597	1
2006	2324	2604	2
2006	2324	2608	1
2006	2324	2610	1
2006	2324	2620	2
2006	2324	2634	2
2006	2324	2640	1
2006	2324	2653	1
2006	2336	2053	1
2006	2336	2310	1
2006	2340	1882	1
2006	2347	1876	3
2006	2347	2263	1
2006	2350	1877	1
2006	2350	1894	1
2006	2350	2044	2
2006	2352	1893	1
2006	2352	1904	1
2006	2352	1981	1
2006	2352	1991	1
2006	2352	2035	1
2006	2352	2039	2
2006	2352	2042	1
2006	2352	2070	1
2006	2357	2038	1
2006	2357	2043	1
2006	2359	2116	2
2006	2359	2134	1
2006	2359	2146	1
2006	2359	2151	1
2006	2361	2309	1
2006	2363	1611	1
2006	2367	1873	1
2006	2367	2494	1
2006	2367	2546	2
2006	2367	2580	1
2006	2386	1954	1
2006	2392	2648	1
2006	2398	2654	1
2006	2401	1897	1
2006	2401	1901	1
2006	2401	1905	1
2006	2401	2040	2
2006	2402	2305	1
2006	2408	1729	1
2006	2408	1808	1
2006	2419	2481	2
2006	2419	2653	1
2006	2420	2091	1
2006	2423	2289	1
2006	2426	2115	1
2006	2426	2119	1
2006	2426	2146	2
2006	2426	2211	1
2006	2426	2233	1
2006	2426	2240	1
2006	2426	2242	1
2006	2426	2267	1
2006	2426	2283	2
2006	2427	2277	3
2006	2442	2649	1
2006	2444	2073	1
2006	2450	2484	1
2006	2451	2363	1
2006	2451	2369	1
2006	2463	2309	1
2006	2471	2124	2
2006	2471	2144	4
2006	2471	2233	1
2006	2471	2236	2
2006	2471	2309	1
2006	2476	2092	1
2006	2482	2058	1
2006	2487	2071	1
2006	2487	2091	1
2006	2487	2484	1
2006	2488	2117	1
2006	2488	2302	1
2006	2494	1671	1
2006	2494	1879	2
2006	2494	2117	2
2006	2494	2315	1
2006	2494	2346	1
2006	2494	2381	2
2006	2494	2454	1
2006	2494	2459	1
2006	2495	1628	6
2006	2495	1640	4
2006	2495	1648	8
2006	2495	1657	2
2006	2495	1661	3
2006	2495	1685	2
2006	2495	1693	2
2006	2495	1726	1
2006	2495	1742	1
2006	2495	1772	1
2006	2495	1804	1
2006	2495	1806	1
2006	2495	2487	3
2006	2495	2491	4
2006	2495	2496	18
2006	2495	2523	2
2006	2495	2530	44
2006	2495	2575	7
2006	2495	2586	26
2006	2495	2613	34
2006	2497	2138	1
2006	2504	2052	1
2006	2507	1882	1
2006	2513	2120	1
2006	2513	2277	1
2006	2514	1904	1
2006	2514	1908	1
2006	2514	2040	1
2006	2514	2043	1
2006	2516	2299	1
2006	2518	1881	1
2006	2522	1886	1
2006	2527	2056	2
2006	2527	2145	1
2006	2527	2148	1
2006	2527	2238	2
2006	2527	2241	1
2006	2527	2301	1
2006	2527	2303	1
2006	2530	2052	2
2006	2542	1888	1
2006	2547	2486	1
2006	2558	2124	1
2006	2558	2134	1
2006	2561	2049	1
2006	2566	2057	1
2006	2574	2145	2
2006	2574	2150	1
2006	2574	2162	1
2006	2574	2166	1
2006	2574	2221	1
2006	2574	2226	1
2006	2574	2239	4
2006	2575	2653	1
2006	2576	2065	1
2006	2603	1876	1
2006	2603	1879	1
2006	2603	2092	1
2006	2606	2053	1
2006	2611	2302	1
2006	2613	1905	1
2006	2613	2037	1
2006	2616	2106	1
2006	2616	2109	1
2006	2616	2112	1
2006	2616	2145	1
2006	2616	2210	1
2006	2616	2280	1
2006	2616	2305	1
2006	2617	1717	1
2006	2623	2148	1
2006	2623	2150	1
2006	2623	2210	1
2006	2623	2303	1
2006	2630	2369	1
2006	2630	2431	1
2006	2630	2438	1
2006	2647	2648	1
2006	2665	1896	1
2006	2669	2124	1
2006	2669	2126	1
[truncated: 171,948 more rows]
