# Supplementary material for: Estimates of Social Contact in a Middle School Based on Self-Report and Wireless Sensor Data
Source: PLoS One. 2016 Apr 21;11(4):e0153690. doi: 10.1371/journal.pone.0153690 (PMC4839567; doi:10.1371/journal.pone.0153690)
Supplement: S3 Dataset — (CSV) [file pone.0153690.s003.csv]

id	contactGender	contactGrade	contactId	ClassPeriod	contactInitialNum
2004	1	8	3127	4	323
2004	0	8	2620	1	335
2004	1	8	99	1	401
2004	1	8	99	9	401
2004	1	8	99	9	401
2004	1	8	99	9	401
2004	0	8	2141	4	432
2004	1	8	99	1	448
2004	1	8	99	1	448
2004	1	8	99	9	448
2004	1	8	99	9	448
2004	1	8	99	9	448
2004	1	8	99	9	448
2004	1	8	99	9	448
2004	1	8	99	9	448
2004	1	8	99	9	448
2004	1	8	2362	4	451
2004	1	8	2362	9	451
2004	1	8	99	4	5
2004	1	8	99	1	63
2004	1	8	99	4	109
2004	1	8	2294	4	127
2004	0	8	99	4	161
2004	0	8	99	4	161
2004	1	8	2274	4	174
2004	1	8	2402	4	183
2004	1	8	2402	9	183
2004	1	8	2402	9	183
2004	0	8	99	4	207
2004	1	8	2603	1	220
2004	1	8	2603	1	220
2004	1	8	2603	1	220
2004	1	8	2603	1	220
2004	1	8	2603	3	220
2004	1	8	2603	4	220
2004	1	8	2603	4	220
2004	1	8	2603	4	220
2004	1	8	2603	9	220
2004	1	8	99	1	284
2004	1	7	99	1	401
2004	1	7	2028	1	449
2004	1	7	2028	1	449
2004	1	7	2028	1	449
2004	1	7	2308	1	4
2004	0	7	99	1	158
2004	1	7	3025	1	265
2006	1	8	99	1	448
2006	1	7	99	9	157
2006	1	7	2028	1	449
2006	1	7	2028	2	449
2006	1	7	2028	9	449
2006	1	7	3158	3	451
2006	1	7	3381	3	6
2006	1	7	99	9	17
2006	0	7	2495	1	39
2006	0	7	2495	2	39
2006	1	7	99	1	44
2006	1	7	99	1	83
2006	1	7	2494	1	92
2006	1	7	99	9	104
2006	1	7	99	9	147
2006	1	7	99	9	175
2006	1	7	99	1	280
2006	1	7	2356	1	298
2006	1	7	2356	2	298
2006	1	7	2408	2	344
2009	0	8	2346	6	279
2009	0	8	99	6	126
2009	1	7	99	9	400
2009	1	7	99	4	79
2009	1	7	3018	6	113
2009	1	7	99	2	157
2009	0	7	99	7	415
2009	0	7	2265	7	417
2009	0	7	2395	3	434
2009	0	7	2395	4	434
2009	0	7	99	3	452
2009	0	7	99	1	67
2009	0	7	99	2	67
2009	0	7	3134	3	97
2009	1	7	3427	6	102
2009	0	7	99	3	103
2009	0	7	99	7	103
2009	1	7	99	9	114
2009	0	7	3033	4	136
2009	1	7	99	3	158
2009	1	7	99	3	175
2009	1	7	99	4	178
2009	0	7	2251	4	249
2009	0	7	3387	7	271
2009	1	7	99	6	276
2009	0	7	99	3	303
2009	1	7	2575	4	321
2010	1	8	99	4	400
2010	0	8	99	2	411
2010	0	8	2086	2	24
2010	1	8	99	4	68
2010	1	8	99	9	68
2010	1	8	99	1	124
2010	1	8	99	1	401
2010	1	8	2004	4	402
2010	0	8	3220	4	408
2010	1	8	99	9	5
2010	1	8	99	4	63
2010	1	8	2473	6	66
2010	0	8	3234	4	70
2010	1	8	99	1	109
2010	0	8	2163	2	114
2010	0	8	99	6	117
2010	1	8	2294	4	127
2010	1	8	2056	3	171
2010	0	8	99	3	176
2010	0	8	2323	9	213
2010	1	8	99	7	218
2010	0	8	99	9	270
2010	1	8	99	2	285
2010	1	8	2547	9	298
2010	0	8	99	2	326
2010	0	8	99	5	362
2010	1	8	3165	1	391
2010	1	8	2665	4	395
2017	1	99	99	9	111
2017	1	8	99	7	334
2017	0	8	99	7	400
2017	1	8	99	7	68
2017	1	8	3091	1	101
2017	0	8	99	3	407
2017	0	8	3229	9	415
2017	0	8	99	9	416
2017	1	8	2189	9	423
2017	1	8	2546	7	447
2017	1	8	2695	4	16
2017	0	8	99	7	21
2017	1	8	99	7	27
2017	1	8	2309	5	62
2017	0	8	3374	9	132
2017	1	8	2310	4	160
2017	1	8	2056	9	171
2017	1	8	2124	9	175
2017	0	8	99	7	176
2017	0	8	99	7	181
2017	1	8	99	9	218
2017	0	8	2698	7	291
2017	0	8	99	7	294
2017	1	8	99	7	296
2017	1	8	2547	7	298
2017	1	8	99	7	304
2017	0	8	99	3	310
2017	0	8	99	7	321
2017	0	8	99	5	324
2017	0	8	99	9	326
2017	1	8	99	2	344
2017	1	8	99	7	344
2017	0	8	99	5	364
2020	1	7	99	1	57
2020	0	7	99	2	414
2020	1	7	99	9	448
2020	1	7	99	1	17
2020	1	7	3119	9	67
2020	0	7	99	7	117
2020	1	7	99	3	129
2020	1	7	99	9	132
2020	1	7	99	1	138
2020	0	7	99	1	138
2020	1	7	99	5	147
2020	1	7	99	2	281
2020	0	7	99	3	285
2020	0	7	2227	7	367
2020	1	7	2433	9	392
2022	1	8	2347	1	17
2022	1	8	99	1	188
2022	1	8	99	1	188
2022	1	8	99	2	188
2022	1	7	2363	1	68
2022	0	7	99	3	452
2022	1	7	3119	1	67
2022	1	7	3119	9	67
2022	0	7	2218	7	69
2022	1	7	2267	1	70
2022	1	7	2267	9	70
2022	0	7	3134	3	97
2022	0	7	99	3	103
2022	0	7	99	6	104
2022	0	7	99	1	107
2022	1	7	99	2	114
2022	1	7	99	1	138
2022	1	7	99	9	138
2022	0	7	99	7	143
2022	0	7	99	1	171
2022	0	7	99	6	176
2022	0	7	99	7	176
2022	1	7	2356	1	298
2022	1	7	2408	1	344
2022	1	7	2408	1	344
2022	1	7	2408	2	344
2022	1	7	2433	1	392
2022	1	7	2433	9	392
2022	0	7	99	6	394
2023	1	8	2546	9	447
2023	1	8	99	9	448
2023	1	8	3078	9	39
2023	1	8	2309	1	62
2023	1	8	3136	1	324
2023	1	7	99	6	400
2023	1	7	99	3	444
2023	0	7	2510	4	35
2023	0	7	99	6	335
2023	0	7	99	6	390
2023	1	7	2034	1	413
2023	0	7	99	6	452
2023	1	7	2308	5	4
2023	1	7	3180	3	27
2023	0	7	2495	6	39
2023	0	7	99	3	104
2023	0	7	99	3	110
2023	1	7	99	6	132
2023	0	7	3033	3	136
2023	1	7	99	9	167
2023	0	7	99	9	176
2023	1	7	99	6	177
2023	1	7	3025	3	265
2023	0	7	2565	3	283
2023	1	7	2358	4	291
2024	0	8	99	1	46
2024	0	8	99	1	46
2024	1	8	3110	2	410
2024	1	8	2376	9	416
2024	0	8	99	1	449
2024	0	8	99	9	449
2024	1	8	99	2	5
2024	1	8	99	2	5
2024	1	8	99	5	6
2024	1	8	99	5	6
2024	1	8	2458	1	38
2024	1	8	2458	2	38
2024	1	8	2458	2	38
2024	1	8	2458	6	38
2024	1	8	2458	6	38
2024	1	8	2458	9	38
2024	1	8	99	5	64
2024	1	8	2369	3	92
2024	1	8	2369	3	92
2024	1	8	2369	4	92
2024	1	8	2369	4	92
2024	1	8	99	2	109
2024	1	8	99	5	109
2024	1	8	99	5	109
2024	0	8	2246	1	177
2024	0	8	2246	1	177
2024	1	8	99	1	188
2024	1	8	99	5	188
2024	1	8	99	6	188
2024	1	8	99	9	188
2024	1	8	99	9	195
2024	0	8	99	3	195
2024	0	8	99	4	195
2024	1	8	3233	1	202
2024	1	8	3233	5	202
2024	1	8	3233	5	202
2024	1	8	2277	9	213
2024	1	8	99	2	344
2024	1	8	99	2	344
2024	1	7	2028	3	449
2024	1	7	2028	4	449
2024	0	7	3013	3	449
2024	0	7	3013	3	449
2024	0	7	3013	4	449
2024	0	7	3013	4	449
2024	1	7	3040	1	166
2024	1	7	3040	3	166
2024	1	7	3040	4	166
2024	1	7	3040	9	166
2024	0	7	3434	3	263
2024	0	7	3434	3	263
2024	0	7	3434	4	263
2024	0	7	3434	4	263
2024	1	7	99	3	283
2024	1	7	99	4	283
2024	0	7	3179	3	372
2024	0	7	3179	3	372
2024	0	7	3179	4	372
2024	0	7	3179	4	372
2024	1	7	99	9	393
2028	1	8	2004	1	402
2028	1	8	99	1	448
2028	1	8	2603	1	220
2028	1	8	2603	1	220
2028	1	7	99	7	2
2028	1	7	3419	5	35
2028	1	7	2350	1	46
2028	1	7	2350	1	46
2028	1	7	2350	1	46
2028	1	7	2350	2	46
2028	1	7	2350	2	46
2028	1	7	2350	2	46
2028	1	7	2350	3	46
2028	1	7	2350	4	46
2028	1	7	2350	9	46
2028	1	7	2363	1	68
2028	1	7	99	3	90
2028	0	7	2628	6	146
2028	1	7	99	9	157
2028	1	7	2028	4	449
2028	1	7	2028	9	449
2028	1	7	3158	6	451
2028	1	7	3158	9	451
2028	1	7	99	7	453
2028	1	7	2308	2	4
2028	1	7	2308	9	4
2028	1	7	99	5	9
2028	1	7	3226	4	33
2028	1	7	3226	9	33
2028	0	7	2495	4	39
2028	0	7	99	4	67
2028	1	7	2195	6	81
2028	0	7	99	4	110
2028	1	7	2401	3	121
2028	1	7	99	3	126
2028	1	7	3235	3	137
2028	1	7	3235	9	137
2028	1	7	99	9	147
2028	1	7	99	9	177
2028	0	7	2460	6	241
2028	1	7	2006	2	288
2028	1	7	2006	5	288
2028	1	7	2006	9	288
2028	1	7	2356	1	298
2028	1	7	2356	2	298
2028	1	7	2356	4	298
2028	1	7	2356	6	298
2028	1	7	2356	6	298
2028	0	7	99	7	307
2028	1	7	2408	2	344
2028	1	7	99	3	393
2028	0	7	99	4	394
2031	1	8	3127	6	323
2031	1	8	3127	7	323
2031	1	8	2125	9	428
2031	1	8	2546	1	447
2031	1	8	2546	2	447
2031	1	8	3078	1	39
2031	1	8	3078	2	39
2032	1	7	99	6	400
2032	1	7	3241	7	411
2032	1	7	99	4	2
2032	1	7	99	1	90
2032	0	7	99	1	179
2032	0	7	99	3	179
2032	1	7	99	3	406
2032	1	7	99	4	406
2032	0	7	99	4	414
2032	0	7	99	4	416
2032	0	7	2265	5	417
2032	0	7	2095	9	427
2032	1	7	3190	1	5
2032	0	7	99	1	12
2032	0	7	3263	4	32
2032	0	7	3263	9	32
2032	0	7	99	5	72
2032	0	7	3001	9	84
2032	0	7	3262	3	99
2032	0	7	99	5	107
2032	1	7	99	7	143
2032	0	7	99	3	175
2032	0	7	3393	1	284
2032	0	7	3115	2	291
2032	1	7	2468	2	295
2032	0	7	2687	5	306
2032	0	7	99	1	307
2032	0	7	3163	9	361
2041	0	8	3015	5	113
2041	1	8	99	5	49
2041	1	8	99	5	144
2041	1	8	2300	9	276
2041	0	7	2510	4	35
2041	1	7	99	2	57
2041	0	7	99	2	135
2041	0	7	3283	6	301
2041	0	7	2395	4	434
2041	0	7	2395	5	434
2041	1	7	99	4	17
2041	1	7	3448	6	59
2041	0	7	99	5	67
2041	0	7	99	2	100
2041	1	7	99	6	126
2041	1	7	99	1	175
2041	1	7	2514	2	178
2041	1	7	2514	6	178
2041	0	7	99	3	187
2041	1	7	3291	3	220
2041	0	7	2155	1	231
2041	0	7	2155	5	231
2041	0	7	99	2	285
2041	1	7	2105	1	296
2042	1	8	99	7	400
2042	1	8	99	5	124
2042	1	8	3127	4	323
2042	1	8	3127	6	323
2042	1	8	99	1	401
2042	1	8	99	2	401
2042	1	8	99	9	401
2042	1	8	2004	1	402
2042	1	8	2004	4	402
2042	1	8	2004	9	402
2042	0	8	3220	4	408
2042	0	8	2141	6	432
2042	0	8	2141	7	432
2042	1	8	3098	4	14
2042	1	8	2695	7	16
2042	1	8	3135	7	42
2042	1	8	2294	4	127
2042	1	8	99	7	158
2042	1	8	2310	9	160
2042	0	8	99	4	161
2042	0	8	99	5	161
2042	1	8	2124	7	175
2042	1	8	2402	9	183
2042	1	8	99	6	188
2042	1	8	99	7	188
2042	1	8	2678	3	189
2042	0	8	99	4	207
2042	1	8	2277	5	213
2042	1	8	2603	1	220
2042	1	8	2603	7	220
2042	1	8	2603	7	220
2042	1	8	99	5	230
2042	0	8	99	6	307
2042	0	8	99	1	362
2042	1	7	2363	1	68
2042	1	7	2028	1	449
2042	0	7	99	6	210
2042	1	7	2006	1	288
2042	0	7	3115	6	291
2047	0	8	3269	3	101
2047	0	8	3378	3	52
2047	0	8	2257	3	98
2047	0	8	99	1	104
2047	0	8	2594	2	121
2047	0	8	2202	1	163
2047	0	8	99	2	171
2047	0	8	99	4	176
2047	0	8	99	4	195
2047	0	8	2577	4	260
2048	1	8	99	4	400
2048	1	8	99	2	57
2048	1	8	3091	4	101
2048	1	8	99	3	403
2048	1	8	2362	1	451
2048	1	8	2348	1	454
2048	1	8	2461	4	12
2048	1	8	3098	4	14
2048	1	8	2347	3	17
2048	1	8	99	4	63
2048	1	8	2600	1	126
2048	1	8	2294	1	127
2048	1	8	99	5	158
2048	0	8	99	5	219
2048	0	8	99	6	219
2048	1	8	2603	4	220
2048	1	8	2629	2	237
2048	1	8	2632	3	297
2048	1	8	99	3	329
2048	0	8	99	4	371
2048	1	7	3336	5	124
2048	1	7	3336	6	124
2048	1	7	3226	5	33
2048	1	7	3226	6	33
2048	0	7	2565	5	283
2048	0	7	2565	6	283
2052	0	8	99	2	357
2052	0	8	99	9	357
2052	1	7	99	4	400
2052	1	7	3241	4	411
2052	1	7	2363	5	68
2052	0	7	99	5	335
2052	0	7	2485	4	401
2052	0	7	2597	4	405
2052	0	7	2597	5	405
2052	1	7	99	3	406
2052	0	7	2095	7	427
2052	1	7	99	7	9
2052	0	7	3263	7	32
2052	0	7	2495	3	39
2052	0	7	2495	7	39
2052	0	7	99	2	98
2052	0	7	99	5	98
2052	0	7	3262	3	99
2052	0	7	99	3	100
2052	0	7	99	1	104
2052	0	7	99	7	104
2052	0	7	99	7	104
2052	0	7	99	3	107
2052	0	7	99	2	140
2052	0	7	99	3	140
2052	1	7	3170	7	151
2052	0	7	99	2	195
2052	1	7	99	2	203
2052	1	7	99	9	203
2052	0	7	3393	7	284
2052	0	7	3115	5	291
2052	1	7	2468	5	295
2052	1	7	2053	2	310
2052	1	7	2053	9	310
2052	0	7	3130	2	310
2052	0	7	3163	2	361
2052	0	7	99	2	381
2053	1	7	99	9	400
2053	1	7	99	9	2
2053	1	7	2363	5	68
2053	1	7	99	7	346
2053	0	7	99	7	415
2053	0	7	2265	1	417
2053	1	7	3329	9	434
2053	1	7	3255	9	163
2053	1	7	3342	9	192
2053	1	7	99	6	276
2053	1	7	99	2	285
2054	0	8	99	2	68
2054	0	8	99	5	68
2054	1	8	3091	7	101
2054	1	8	99	5	124
2054	0	8	2620	7	335
2054	0	8	3229	9	415
2054	0	8	99	9	416
2054	1	8	2189	9	423
2054	1	8	3078	4	39
2054	1	8	3135	6	42
2054	1	8	99	1	63
2054	0	8	3444	7	67
2054	1	8	2273	7	81
2054	1	8	2602	3	84
2054	1	8	2476	1	97
2054	1	8	2031	3	98
2054	1	8	2299	9	142
2054	1	8	2056	9	171
2054	1	8	2124	9	175
2054	1	8	99	9	218
2054	1	8	2444	9	238
2054	1	8	99	3	285
2054	1	8	2547	3	298
2054	1	8	3136	9	324
2054	1	8	99	9	326
2054	0	8	99	5	371
2056	1	8	99	5	400
2056	1	8	3091	2	101
2056	1	8	99	3	157
2056	0	8	99	4	416
2056	0	8	99	4	442
2056	0	8	2614	4	138
2056	1	8	2299	9	142
2056	1	8	2274	3	174
2056	1	8	2300	2	276
2056	1	8	99	4	307
2056	1	8	99	9	311
2056	1	8	99	9	344
2059	1	8	2296	6	411
2059	0	8	99	1	411
2059	1	8	2269	5	46
2059	0	8	99	1	301
2059	1	8	3127	2	323
2059	1	8	3436	6	450
2059	1	8	2530	6	452
2059	1	8	99	5	6
2059	1	8	2461	2	12
2059	1	8	99	5	59
2059	1	8	2456	7	172
2059	1	8	2402	1	183
2059	1	8	3233	1	202
2059	1	8	99	2	218
2059	1	8	99	2	296
2059	1	7	99	3	400
2059	1	7	2363	3	68
2059	0	7	99	3	138
2060	1	8	99	9	68
2060	0	8	99	3	416
2060	1	8	2566	2	34
2060	1	8	2415	1	55
2060	1	8	99	9	63
2060	1	8	2310	2	160
2060	1	8	2056	9	171
2060	1	8	3253	1	320
2060	1	8	3165	6	391
2060	1	8	2665	1	395
2061	0	7	2238	3	409
2061	0	7	2544	2	423
2061	0	7	2544	3	423
2061	0	7	2395	1	434
2061	0	7	2420	3	435
2061	0	7	99	1	439
2061	0	7	3013	2	449
2061	1	7	99	3	9
2061	1	7	99	2	126
2061	1	7	99	2	131
2061	0	7	99	2	143
2061	0	7	99	3	143
2061	0	7	99	2	247
2061	0	7	3393	3	284
2062	1	8	99	7	334
2062	0	8	99	6	411
2062	0	8	99	3	46
2062	1	8	99	9	68
2062	1	8	2004	6	402
2062	0	8	99	1	416
2062	0	8	2025	2	428
2062	1	8	2530	6	452
2062	1	8	2348	3	454
2062	1	8	99	2	5
2062	1	8	2458	1	38
2062	1	8	99	5	63
2062	1	8	99	1	87
2062	1	8	3197	3	104
2062	1	8	99	2	109
2062	0	8	2163	7	114
2062	1	8	2294	6	127
2062	1	8	2268	1	164
2062	1	8	2124	6	175
2062	1	8	3209	3	228
2062	1	8	2300	4	276
2062	1	8	2300	9	276
2062	1	8	99	1	291
2062	1	8	99	2	291
2062	1	8	2547	7	298
2062	1	8	99	1	307
2062	1	8	3253	5	320
2062	1	8	3165	4	391
2062	1	7	3241	5	411
2062	1	7	99	5	406
2062	1	7	2195	5	81
2062	1	7	99	5	138
2062	1	7	2408	5	344
2065	0	7	99	2	439
2065	1	7	99	9	93
2065	0	7	3134	2	97
2065	0	7	99	9	103
2065	1	7	3169	4	219
2065	1	7	2358	3	291
2065	1	7	2358	9	291
2065	0	7	3179	2	372
2068	0	8	3086	5	299
2068	1	7	99	9	57
2068	1	7	2020	9	414
2068	0	7	2061	4	436
2068	1	7	99	1	17
2068	1	7	3427	2	102
2068	1	7	99	7	147
2068	1	7	2450	9	191
2068	1	7	99	2	285
2071	0	7	99	1	444
2071	0	7	3183	3	6
2071	0	7	99	3	104
2071	0	7	99	1	109
2071	0	7	99	1	109
2071	1	7	99	3	147
2071	0	7	99	3	159
2071	1	7	99	3	176
2071	0	7	99	1	177
2071	0	7	3426	1	244
2071	0	7	3426	1	244
2071	0	7	2251	3	249
2071	1	7	2105	3	296
2071	1	7	2356	1	298
2071	0	7	2687	1	306
2071	0	7	99	3	314
2071	0	7	99	3	315
2072	0	8	99	4	80
2072	0	7	3245	4	334
2072	1	7	99	1	101
2072	0	7	3006	4	113
2072	0	7	99	4	390
2072	0	7	2343	1	410
2072	0	7	2343	1	410
2072	0	7	2265	1	417
2072	0	7	3191	4	432
2072	1	7	99	4	453
2072	0	7	2071	1	28
2072	0	7	2071	1	28
2072	0	7	2071	1	28
2072	0	7	99	1	78
2072	0	7	99	1	109
2072	1	7	99	4	132
2072	0	7	99	1	177
2072	0	7	99	1	177
2072	0	7	99	1	177
2072	0	7	99	1	177
2072	0	7	99	1	177
2072	0	7	2407	4	206
2072	0	7	2155	1	231
2072	0	7	99	4	285
2072	1	7	2105	1	296
2072	1	7	2356	1	298
2072	0	7	2687	1	306
2072	0	7	2687	1	306
2072	0	7	2687	1	306
2072	0	7	2227	1	367
2072	0	7	2227	1	367
2072	0	7	2227	1	367
2076	0	8	3388	9	172
2076	1	8	99	1	188
2076	0	8	99	1	202
2076	0	7	2510	6	35
2076	0	7	99	1	335
2076	0	7	99	9	335
2076	0	7	2238	6	409
2076	0	7	2420	3	435
2076	0	7	2420	3	435
2076	0	7	2420	9	435
2076	1	7	99	3	17
2076	1	7	99	9	17
2076	0	7	2495	1	39
2076	0	7	2495	9	39
2076	0	7	99	9	98
2076	0	7	99	1	107
2076	0	7	99	9	110
2076	1	7	99	1	114
2076	0	7	2276	1	114
2076	0	7	2593	9	141
2076	1	7	99	5	143
2076	0	7	2424	1	153
2076	0	7	2424	2	153
2076	0	7	99	5	175
2076	1	7	99	7	177
2076	0	7	99	1	187
2076	0	7	99	2	195
2076	0	7	3400	9	202
2076	0	7	99	7	210
2076	0	7	2251	6	249
2076	1	7	3025	4	265
2076	1	7	99	1	280
2076	0	7	3115	3	291
2076	0	7	99	9	303
2076	0	7	2697	6	353
2076	0	7	2697	9	353
2077	0	8	2412	5	439
2077	1	8	2362	5	451
2077	1	8	99	5	6
2077	0	8	99	5	12
2077	1	8	2347	5	17
2077	1	8	2347	5	17
2077	1	8	2369	5	92
2077	1	8	2369	5	92
2077	1	8	2369	5	92
2077	0	8	3164	5	193
2077	0	8	99	5	195
2077	0	8	99	5	195
2077	0	8	99	5	195
2077	1	8	2632	5	297
2077	1	7	2527	4	117
2077	1	7	3255	4	163
2077	1	7	3255	4	163
2077	0	7	99	4	195
2077	0	7	99	4	195
2077	1	7	3350	4	226
2077	1	7	99	4	280
2077	1	7	99	4	280
2078	0	8	99	2	411
2078	1	8	99	9	68
2078	0	8	99	7	68
2078	1	8	99	5	124
2078	0	8	2661	2	157
2078	0	8	99	5	224
2078	1	8	3127	5	323
2078	0	8	3229	1	415
2078	1	8	99	3	420
2078	1	8	99	2	49
2078	0	8	3444	6	67
2078	0	8	99	2	94
2078	0	8	2650	5	110
2078	0	8	2650	6	110
2078	0	8	2163	6	114
2078	0	8	2163	7	114
2078	0	8	99	9	143
2078	1	8	99	5	199
2078	0	8	3214	3	266
2078	0	8	99	3	296
2078	1	8	99	2	326
2078	1	8	2164	9	339
2078	0	8	99	9	374
2078	0	7	99	9	98
2080	1	8	99	7	400
2080	1	8	99	2	57
2080	1	8	99	6	57
2080	1	8	99	9	57
2080	1	8	99	3	68
2080	0	8	99	3	79
2080	0	8	2620	1	335
2080	1	8	2004	6	402
2080	0	8	3220	1	408
2080	0	8	2025	9	428
2080	1	8	99	2	448
2080	1	8	99	6	448
2080	0	8	2200	3	40
2080	1	8	2415	9	55
2080	1	8	99	9	63
2080	0	8	2159	6	71
2080	1	8	2602	6	84
2080	0	8	2404	9	89
2080	0	8	2270	1	102
2080	1	8	3197	1	104
2080	0	8	99	9	104
2080	1	8	99	9	109
2080	0	8	99	1	117
2080	1	8	2294	6	127
2080	1	8	2310	9	160
2080	1	8	2274	9	174
2080	1	8	2124	3	175
2080	1	8	2124	6	175
2080	0	8	99	9	176
2080	1	8	2475	9	182
2080	0	8	99	2	182
2080	1	8	2603	6	220
2080	1	8	2629	2	237
2080	1	8	99	4	296
2080	1	7	3291	9	220
2081	1	8	2488	1	422
2081	1	8	99	2	68
2081	0	8	99	2	68
2081	0	8	99	6	68
2081	1	8	3091	9	101
2081	1	8	2610	1	146
2081	0	8	99	2	407
2081	0	8	2025	3	428
2081	1	8	2496	1	438
2081	0	8	2331	1	39
2081	1	8	2415	1	55
2081	1	8	2273	3	81
2081	1	8	2206	1	108
2081	1	8	99	3	188
2081	0	8	2323	1	213
2081	1	8	99	9	217
2081	1	8	99	6	225
2081	1	8	2096	3	275
2081	1	8	99	1	307
2081	1	8	2665	1	395
2081	0	7	99	9	446
2081	1	7	3180	7	27
2086	0	8	2412	3	439
2086	0	8	2257	7	98
2086	1	8	2124	3	175
2086	0	8	99	3	188
2086	0	8	2008	7	199
2086	0	7	99	5	117
2086	0	7	2251	9	249
2086	0	7	99	5	267
2087	1	7	99	7	444
2087	0	99	99	4	68
2087	1	99	99	6	101
2087	0	99	99	9	290
2087	0	7	99	5	409
2087	0	99	99	3	415
2087	0	99	99	6	448
2087	1	7	99	5	9
2087	1	8	99	4	87
2087	1	99	99	5	132
2087	1	7	99	7	158
2087	0	99	99	3	176
2087	0	99	99	3	195
2087	0	99	99	6	195
2087	0	7	99	9	370
2088	0	8	2620	2	335
2088	0	8	99	2	414
2088	1	8	3436	1	450
2088	1	8	2695	5	16
2088	0	8	99	2	171
2088	0	8	2577	2	260
2088	0	8	99	2	362
2088	0	8	3411	2	389
2088	1	7	3443	5	206
2089	0	8	99	5	1
2089	1	8	99	3	398
2089	0	7	99	3	1
2089	1	7	99	3	57
2089	0	7	2395	2	434
2089	0	7	99	1	20
2089	0	7	99	2	20
2089	1	7	99	6	62
2089	0	7	2218	3	69
2089	1	7	99	2	72
2089	1	7	99	6	94
2089	0	7	99	1	94
2089	0	7	3134	3	97
2089	0	7	3134	3	97
2089	0	7	99	3	103
2089	0	7	99	4	103
2089	0	7	99	2	109
2089	1	7	99	2	138
2089	0	7	99	6	143
2089	1	7	99	3	147
2089	1	7	99	1	158
2089	1	7	99	3	158
2089	1	7	2041	4	160
2089	0	7	99	1	167
2089	0	7	99	2	167
2089	1	7	99	4	175
2089	1	7	2514	2	178
2089	0	7	2282	4	207
2089	0	7	99	1	239
2089	1	7	99	2	276
2089	0	7	99	4	285
2089	1	7	2356	1	298
2089	0	7	99	1	307
2091	1	7	3085	2	77
2091	1	7	2527	3	117
2091	1	7	3358	2	118
2091	1	7	3358	5	118
2091	1	7	2514	1	178
2091	1	7	2514	2	178
2091	1	7	2514	2	178
2091	0	7	99	2	187
2091	1	7	2468	3	295
2091	1	7	2623	2	300
2091	0	7	2227	3	367
2091	0	7	99	2	371
2093	0	8	99	4	334
2093	0	8	99	9	57
2093	0	8	3269	4	101
2093	0	8	2667	5	402
2093	0	8	2667	6	402
2093	1	8	99	7	448
2093	0	8	3016	5	3
2093	0	8	3016	6	3
2093	1	8	99	1	6
2093	0	8	2200	5	40
2093	0	8	2200	6	40
2093	1	8	99	5	59
2093	1	8	99	6	59
2093	1	8	99	1	80
2093	1	8	99	5	80
2093	1	8	99	6	80
2093	1	8	99	7	80
2093	1	8	99	9	80
2093	0	8	99	4	104
2093	1	8	99	4	109
2093	1	8	99	4	109
2093	1	8	99	5	158
2093	1	8	99	6	158
2093	0	8	3084	2	210
2093	0	8	2689	2	317
2093	0	8	99	2	320
2093	0	8	99	4	320
2093	0	8	99	9	386
2095	1	7	3241	4	411
2095	1	7	2363	4	68
2095	1	7	99	5	246
2095	1	7	3097	2	323
2095	0	7	2485	5	401
2095	0	7	2597	4	405
2095	0	7	99	2	414
2095	0	7	99	3	414
2095	1	7	99	1	9
2095	0	7	99	1	12
2095	0	7	3262	9	99
2095	0	7	99	9	104
2095	1	7	3439	4	155
2095	0	7	99	2	195
2095	1	7	99	9	203
2095	1	7	3203	2	231
2095	0	7	99	9	232
2095	0	7	3393	9	284
2095	1	7	2468	1	295
2095	0	7	3163	9	361
2096	1	8	99	7	400
2096	1	8	2296	1	411
2096	1	8	2296	2	411
2096	1	8	2189	9	423
2096	1	8	2125	9	428
2096	1	8	2496	7	438
2096	1	8	2546	2	447
2096	1	8	3078	2	39
2096	1	8	99	7	40
2096	1	8	3135	1	42
2096	1	8	2309	1	62
2096	1	8	99	5	63
2096	1	8	2080	5	71
2096	1	8	2273	3	81
2096	1	8	2031	4	98
2096	1	8	2206	7	108
2096	1	8	99	5	109
2096	0	8	3374	7	132
2096	1	8	2299	1	142
2096	0	8	99	2	142
2096	1	8	2056	9	171
2096	1	8	2399	5	176
2096	1	8	99	4	180
2096	1	8	99	3	188
2096	1	8	99	6	218
2096	1	8	2446	6	236
2096	1	8	2313	7	273
2096	1	8	99	6	285
2096	1	8	2541	9	289
2096	1	8	99	9	307
2096	1	8	99	9	307
2096	1	8	3253	9	320
2096	1	8	2164	4	339
2096	1	8	99	4	362
2096	1	8	99	7	362
2096	1	7	99	5	446
2096	1	7	99	5	17
2096	1	7	99	5	49
2096	1	7	99	5	72
2096	1	7	99	5	122
2096	1	7	99	5	167
2097	1	99	99	3	454
2097	0	8	99	3	121
2097	1	99	99	3	156
2097	1	99	99	3	171
2097	0	99	99	3	172
2097	1	8	3091	2	101
2097	1	8	99	2	201
2097	1	8	2310	3	160
2098	0	8	2335	9	341
2098	1	7	99	1	334
2098	0	7	3283	1	301
2098	0	7	99	2	398
2098	0	7	3432	1	450
2098	0	7	99	1	49
2098	1	7	2549	1	103
2098	0	7	99	9	122
2098	0	7	99	2	307
2098	0	7	99	3	307
2098	0	7	99	4	307
2099	0	99	99	2	443
2099	0	8	2398	4	323
2099	1	8	2004	1	402
2099	1	8	2004	1	402
2099	1	8	2004	1	402
2099	0	8	2141	9	432
2099	1	8	99	1	448
2099	1	8	99	1	448
2099	1	8	99	6	5
2099	1	8	2695	9	16
2099	1	8	2347	1	17
2099	1	8	2347	1	17
2099	1	8	2347	2	17
2099	1	8	2347	6	17
2099	1	8	99	1	63
2099	1	8	99	1	63
2099	1	8	99	5	63
2099	1	8	2473	4	66
2099	1	8	99	7	80
2099	1	8	2602	9	84
2099	0	8	2404	4	89
2099	0	8	99	4	104
2099	1	8	99	9	109
2099	1	8	2310	4	160
2099	1	8	2310	9	160
2099	0	8	99	2	161
2099	0	8	99	4	176
2099	1	8	2475	6	182
2099	1	8	2475	9	182
2099	1	8	99	1	188
2099	0	8	2558	9	206
2099	1	8	99	5	218
2099	0	8	2698	4	291
2099	1	8	99	9	296
2099	0	8	99	2	324
2099	0	7	99	1	335
2099	1	7	99	6	396
2099	1	7	2308	1	4
2099	1	7	3025	1	265
2099	1	7	3025	6	265
2111	0	7	3245	4	334
2111	1	7	2483	9	422
2111	1	7	99	2	24
2111	1	7	99	9	101
2111	1	7	3174	6	415
2111	1	7	3174	6	415
2111	1	7	2028	5	449
2111	1	7	99	4	453
2111	1	7	3381	7	6
2111	0	7	2553	2	18
2111	0	7	2126	2	106
2111	0	7	99	3	107
2111	0	7	99	6	110
2111	1	7	99	7	116
2111	1	7	99	9	177
2111	0	7	99	4	245
2111	1	7	99	5	284
2111	1	7	2356	6	298
2111	0	7	99	3	302
2111	1	7	2575	9	321
2111	0	7	3100	6	370
2112	1	8	3078	9	39
2112	1	7	99	6	334
2112	1	7	99	2	101
2112	0	7	3168	7	406
2112	0	7	3414	2	421
2112	0	7	99	6	452
2112	0	7	99	7	452
2112	0	7	2553	7	18
2112	0	7	99	9	176
2112	0	7	99	2	177
2112	0	7	99	6	187
2112	0	7	99	9	245
2117	1	8	99	2	400
2117	1	8	99	7	400
2117	1	8	99	9	400
2117	0	8	99	2	46
2117	0	8	99	3	46
2117	0	8	99	9	46
2117	1	8	3091	5	101
2117	1	8	3091	9	101
2117	1	8	3127	2	323
2117	1	8	3127	6	323
2117	1	8	3127	9	323
2117	1	8	99	7	401
2117	1	8	2004	9	402
2117	0	8	3220	9	408
2117	1	8	99	6	448
2117	1	8	99	7	448
2117	1	8	99	9	448
2117	1	8	2362	5	451
2117	1	8	2362	9	451
2117	1	8	99	3	5
2117	1	8	99	4	5
2117	1	8	99	5	5
2117	1	8	99	6	5
2117	1	8	99	7	5
2117	1	8	99	9	5
2117	0	8	99	1	12
2117	1	8	3135	7	42
2117	0	8	3234	9	70
2117	0	8	99	3	97
2117	0	8	99	4	97
2117	0	8	99	9	104
2117	0	8	99	9	108
2117	1	8	99	1	109
2117	0	8	99	5	126
2117	0	8	99	9	126
2117	1	8	99	1	158
2117	1	8	99	2	158
2117	1	8	2310	2	160
2117	1	8	2310	7	160
2117	0	8	3388	5	172
2117	1	8	2124	7	175
2117	1	8	2402	9	183
2117	1	8	99	2	188
2117	1	8	99	7	188
2117	1	8	99	9	188
2117	1	8	2678	9	189
2117	0	8	99	1	195
2117	0	8	99	9	195
2117	0	8	2008	9	199
2117	0	8	3089	5	295
2117	0	8	99	4	319
2117	0	8	99	5	319
2117	0	8	99	3	362
2117	0	8	99	4	362
2117	0	8	99	9	362
2117	0	8	99	1	371
2117	0	8	99	9	371
2117	1	8	99	1	385
2117	1	8	99	5	385
2117	1	8	99	7	385
2117	1	7	99	9	246
2117	1	7	3329	3	434
2117	1	7	3329	4	434
2117	1	7	99	3	104
2117	1	7	99	4	104
2117	1	7	3228	9	189
2121	1	7	99	1	400
2121	1	7	99	2	57
2121	0	7	99	6	335
2121	0	7	99	6	390
2121	1	7	3417	7	402
2121	0	7	2597	3	405
2121	0	7	2238	7	409
2121	0	7	3059	7	425
2121	0	7	99	2	431
2121	0	7	3259	7	442
2121	1	7	3158	7	451
2121	0	7	99	6	14
2121	1	7	3448	2	59
2121	1	7	2680	2	71
2121	0	7	2126	2	106
2121	0	7	3033	6	136
2121	1	7	2524	7	142
2121	1	7	3170	3	151
2121	1	7	99	3	154
2121	0	7	99	6	176
2121	1	7	99	6	177
2121	1	7	99	9	242
2124	1	8	2296	6	411
2124	0	8	99	5	411
2124	0	8	99	3	24
2124	1	8	99	2	35
2124	1	8	99	5	57
2124	1	8	99	3	124
2124	1	8	99	3	201
2124	1	8	99	7	401
2124	1	8	99	9	401
2124	0	8	3220	9	408
2124	0	8	2141	9	432
2124	0	8	2412	2	439
2124	1	8	2530	6	452
2124	1	8	2348	5	454
2124	1	8	99	9	5
2124	1	8	99	7	15
2124	1	8	2347	9	17
2124	1	8	2566	9	34
2124	1	8	3135	3	42
2124	1	8	99	4	63
2124	1	8	2080	3	71
2124	1	8	2602	5	84
2124	1	8	2476	9	97
2124	1	8	2476	9	97
2124	0	8	99	5	108
2124	1	8	99	9	109
2124	0	8	99	2	109
2124	0	8	99	5	117
2124	0	8	2594	4	121
2124	1	8	2294	6	127
2124	1	8	2640	9	159
2124	1	8	2310	9	160
2124	0	8	99	1	176
2124	1	8	99	9	180
2124	0	8	2592	5	180
2124	0	8	99	1	180
2124	1	8	2475	9	182
2124	1	8	2678	9	189
2124	0	8	2168	2	218
2124	1	8	99	5	234
2124	1	8	2629	5	237
2124	0	8	99	9	270
2124	1	8	2632	7	297
2124	1	8	2547	5	298
2124	1	8	99	3	307
2124	1	8	3165	6	391
2124	0	7	99	9	135
2124	0	7	99	7	110
2124	1	7	99	9	147
2124	1	7	99	9	177
2124	1	7	2006	4	288
2125	0	8	2216	4	146
2125	1	8	99	9	201
2125	0	8	99	3	406
2125	0	8	99	4	406
2125	0	8	99	5	406
2125	0	8	99	3	416
2125	0	8	99	4	416
2125	1	8	2189	2	423
2125	1	8	2189	3	423
2125	1	8	2189	4	423
2125	1	8	2189	5	423
2125	1	8	2189	6	423
2125	1	8	2189	7	423
2125	0	8	99	9	154
2125	0	8	99	9	176
2125	1	8	2446	9	236
2125	1	8	99	1	307
2125	1	8	3253	2	320
2125	1	8	3253	3	320
2125	1	8	3253	4	320
2125	1	8	3253	5	320
2125	1	8	3253	9	320
2126	0	7	99	2	1
2126	0	7	3245	2	334
2126	1	7	99	2	400
2126	0	7	2090	7	400
2126	0	7	99	2	13
2126	0	7	99	6	414
2126	0	7	99	7	414
2126	0	7	2553	2	18
2126	1	7	3293	7	32
2126	1	7	3226	6	33
2126	1	7	2680	2	71
2126	1	7	2680	2	71
2126	0	7	99	2	98
2126	0	7	3033	2	136
2126	1	7	99	5	204
2131	1	8	99	1	448
2131	1	8	2347	1	17
2131	1	8	99	1	60
2131	1	8	99	1	60
2131	1	8	99	2	60
2131	0	8	2504	6	118
2131	1	8	99	1	188
2131	1	8	99	2	188
2131	1	8	2632	2	297
2131	1	7	2363	1	68
2131	1	7	2308	4	4
2131	1	7	2308	4	4
2131	1	7	2442	9	40
2131	1	7	2680	3	71
2131	1	7	2680	3	71
2131	1	7	2680	9	71
2131	0	7	99	4	107
2131	0	7	99	4	107
2131	0	7	99	6	143
2131	0	7	99	5	253
2131	0	7	3434	5	263
2131	0	7	2565	9	283
2131	0	7	99	3	285
2131	1	7	2006	1	288
2131	0	7	3132	4	288
2131	1	7	2358	5	291
2131	1	7	2356	4	298
2131	0	7	99	1	303
2131	1	7	2408	3	344
2131	1	7	2408	3	344
2131	1	7	2408	4	344
2131	1	7	2408	7	344
2131	1	7	2408	9	344
2131	1	7	2408	9	344
2131	0	7	3179	5	372
2143	1	8	2078	2	1
2143	1	8	99	1	252
2145	0	8	99	9	190
2145	1	8	99	1	401
2145	1	8	99	2	401
2145	1	8	2004	3	402
2145	1	8	2348	9	454
2145	1	8	99	1	5
2145	1	8	99	9	6
2145	1	8	2347	1	17
2145	1	8	2458	9	38
2145	1	8	99	3	109
2145	1	8	99	6	109
2145	0	8	2594	3	121
2145	0	8	99	3	161
2145	1	8	2678	3	189
2145	0	8	99	9	195
2145	1	8	3233	5	202
2145	0	8	2323	9	213
2145	1	8	2603	3	220
2145	1	8	99	9	291
2145	0	8	2698	3	291
2145	1	8	99	7	310
2145	1	8	99	3	329
2145	1	7	99	1	57
2145	1	7	3040	9	166
2145	1	7	99	1	280
2145	1	7	2356	1	298
2145	0	7	99	1	303
2145	0	7	99	2	303
2145	0	7	99	4	311
2145	1	7	2408	1	344
2147	0	7	2628	5	146
2147	0	7	2628	9	146
2147	0	7	2265	9	417
2147	1	7	99	1	11
2147	0	7	99	1	138
2147	0	7	99	2	138
2147	0	7	99	3	138
2147	0	7	3045	1	154
2147	0	7	3045	4	154
2147	0	7	99	7	174
2147	0	7	3152	9	186
2147	0	7	99	7	278
2147	0	7	99	9	278
2147	1	7	2336	1	319
2149	1	99	99	9	157
2149	0	99	99	1	45
2149	1	8	99	4	188
2149	1	99	99	2	252
2149	1	7	99	3	287
2149	1	8	99	2	303
2153	0	8	99	5	301
2153	0	8	99	9	357
2153	0	8	99	9	357
2153	0	8	3220	5	408
2153	0	8	3220	6	408
2153	1	8	99	5	415
2153	1	8	3436	2	450
2153	1	8	2362	2	451
2153	0	8	2627	5	33
2153	0	8	2627	6	33
2153	0	8	3378	2	52
2153	0	8	2088	9	73
2153	0	8	2257	1	98
2153	0	8	99	1	161
2153	0	8	99	9	161
2153	0	8	99	1	171
2153	0	8	99	9	171
2153	0	8	99	5	176
2153	0	8	99	6	176
2153	1	8	2475	2	182
2153	0	8	99	9	207
2153	0	8	2335	6	341
2153	0	8	99	9	362
2153	1	7	3381	3	6
2153	0	7	3115	9	291
2155	1	8	99	5	439
2155	0	8	99	5	367
2155	0	7	99	6	13
2155	0	7	2510	6	35
2155	0	7	99	6	68
2155	0	7	2544	7	423
2155	0	7	2544	9	423
2155	0	7	2395	5	434
2155	0	7	2061	9	436
2155	0	7	3032	2	7
2155	0	7	2240	9	22
2155	0	7	99	3	34
2155	1	7	99	7	62
2155	1	7	2386	7	96
2155	1	7	99	7	126
2155	1	7	2041	1	160
2155	1	7	2041	7	160
2155	0	7	99	6	160
2155	1	7	99	7	162
2155	1	7	3255	7	163
2155	0	7	99	3	171
2155	0	7	99	1	177
2155	0	7	99	7	253
2155	0	7	2230	2	275
2155	1	7	99	2	285
2155	1	7	99	2	285
2155	1	7	99	3	285
2155	1	7	99	4	285
2155	1	7	99	4	285
2155	1	7	99	7	285
2155	0	7	99	2	285
2155	0	7	99	9	285
2155	0	7	2687	7	306
2155	1	7	2575	7	321
2155	0	7	2227	3	367
2155	0	7	2227	4	367
2158	1	8	2296	3	411
2158	1	8	2310	3	160
2158	0	8	99	2	194
2158	0	8	3214	2	266
2158	0	8	2466	2	287
2158	1	7	99	1	90
2158	1	7	99	5	168
2158	0	7	99	5	398
2158	0	7	2597	1	405
2158	1	7	99	4	453
2158	1	7	99	5	31
2158	0	7	3263	1	32
2158	1	7	99	5	122
2158	1	7	99	4	143
2158	1	7	99	9	144
2158	1	7	3170	1	151
2158	1	7	99	7	154
2158	0	7	3434	9	263
2158	1	7	2575	2	321
2163	1	8	99	7	334
2163	0	8	2086	2	24
2163	1	8	3110	4	410
2163	1	8	99	4	19
2163	1	8	99	6	31
2163	1	8	3197	7	104
2163	0	8	2671	3	197
2163	0	8	99	1	202
2163	0	8	2689	9	317
2163	0	8	99	2	326
2163	1	8	99	7	344
2163	0	8	2079	3	361
2163	0	8	99	7	373
2163	0	8	99	3	392
2163	0	7	99	9	190
2163	1	7	99	9	335
2163	0	7	99	9	110
2164	1	8	99	9	334
2164	1	8	2296	5	411
2164	0	8	2171	1	2
2164	0	8	99	1	46
2164	1	8	99	3	68
2164	1	8	99	9	68
2164	1	8	99	2	124
2164	1	8	99	5	335
2164	0	8	99	5	406
2164	1	8	2189	4	423
2164	1	8	2546	9	447
2164	1	8	99	4	448
2164	1	8	2530	6	452
2164	1	8	2348	5	454
2164	0	8	99	3	45
2164	1	8	99	7	59
2164	1	8	2526	5	61
2164	1	8	2031	4	98
2164	0	8	2650	2	110
2164	0	8	2614	1	138
2164	0	8	2242	2	143
2164	1	8	2310	5	160
2164	1	8	99	3	166
2164	1	8	2399	5	176
2164	0	8	2246	4	177
2164	1	8	2446	5	236
2164	0	8	99	5	253
2164	0	8	3214	1	266
2164	0	8	99	5	270
2164	1	8	99	1	284
2164	1	8	2547	5	298
2164	0	8	2689	5	317
2164	1	8	2665	2	395
2169	1	8	2269	2	46
2169	1	8	2269	9	46
2169	0	8	2560	4	268
2169	0	8	99	4	301
2169	0	8	99	7	301
2169	0	8	99	9	301
2169	1	8	3127	1	323
2169	1	8	99	4	5
2169	1	8	99	5	5
2169	1	8	99	4	6
2169	1	8	99	9	6
2169	1	8	3098	6	14
2169	0	8	99	7	34
2169	1	8	99	5	59
2169	1	8	99	9	59
2169	0	8	99	2	97
2169	0	8	99	4	171
2169	0	8	99	7	171
2169	1	8	2456	4	172
2169	1	8	2456	5	172
2169	0	8	3388	6	172
2169	1	8	99	6	180
2169	1	8	2475	9	182
2169	0	8	2577	7	260
2169	0	8	3086	3	299
2170	1	8	99	3	415
2170	1	8	99	4	415
2170	1	8	2376	3	416
2170	1	8	2376	4	416
2170	0	8	99	3	12
2170	0	8	99	4	12
2170	1	8	2369	3	92
2170	1	8	2369	4	92
2170	1	8	99	3	291
2170	1	8	99	4	291
2170	1	7	99	1	334
2170	1	7	99	3	400
2170	1	7	99	4	400
2170	1	7	3419	5	35
2170	0	7	2510	2	35
2170	0	7	3207	3	157
2170	0	7	3207	4	157
2170	0	7	3126	2	396
2170	0	7	3126	7	396
2170	0	7	3059	3	425
2170	0	7	3059	4	425
2170	1	7	2028	5	449
2170	0	7	3013	3	449
2170	0	7	3013	4	449
2170	0	7	3432	5	450
2170	0	7	99	3	452
2170	0	7	99	4	452
2170	1	7	99	5	9
2170	1	7	99	3	11
2170	1	7	99	4	11
2170	1	7	99	5	11
2170	0	7	2495	5	39
2170	0	7	3073	5	65
2170	1	7	3022	3	75
2170	1	7	3022	4	75
2170	1	7	2494	5	92
2170	0	7	99	1	104
2170	0	7	99	3	104
2170	0	7	99	4	104
2170	0	7	99	5	104
2170	0	7	99	9	104
2170	0	7	99	1	109
2170	1	7	99	3	114
2170	1	7	99	4	114
2170	0	7	2276	5	114
2170	0	7	99	5	143
2170	1	7	99	3	144
2170	1	7	99	4	144
2170	0	7	2424	5	153
2170	1	7	99	1	176
2170	1	7	99	3	177
2170	1	7	99	4	177
2170	0	7	99	5	187
2170	1	7	3342	3	192
2170	1	7	3342	4	192
2170	0	7	99	5	195
2170	1	7	3350	3	226
2170	1	7	3350	4	226
2170	1	7	3350	5	226
2170	1	7	3203	3	231
2170	1	7	3203	4	231
2170	0	7	3434	3	263
2170	0	7	3434	4	263
2170	1	7	99	3	280
2170	1	7	99	4	280
2170	1	7	99	5	280
2170	1	7	99	3	283
2170	1	7	99	4	283
2170	1	7	2006	5	288
2170	0	7	3132	2	288
2170	1	7	2356	5	298
2170	0	7	99	5	303
2170	0	7	99	1	307
2170	0	7	3420	3	320
2170	0	7	3420	4	320
2170	0	7	99	3	341
2170	0	7	99	4	341
2170	0	7	3179	3	372
2170	0	7	3179	4	372
2170	0	7	99	3	386
2170	0	7	99	4	386
2171	0	8	99	1	46
2171	0	8	2216	3	146
2171	0	8	99	1	190
2171	0	8	2560	3	268
2171	0	8	2620	1	335
2171	0	8	99	2	368
2171	0	8	99	1	406
2171	0	8	2141	2	432
2171	0	8	3444	3	67
2171	1	8	2080	1	71
2171	0	8	2270	1	102
2171	0	8	99	2	117
2171	0	8	2504	3	118
2171	0	8	2614	1	138
2171	0	8	99	1	176
2171	0	8	2246	9	177
2171	0	8	2008	2	199
2171	0	8	99	1	216
2171	0	8	2410	1	254
2171	0	8	3214	1	266
2171	1	8	99	1	299
2171	0	8	2500	1	376
2173	1	8	99	1	400
2173	1	8	99	2	400
2173	1	8	99	3	400
2173	1	8	99	1	35
2173	0	8	2661	3	157
2173	1	8	3127	2	323
2173	1	8	99	2	401
2173	1	8	99	1	188
2173	1	8	99	1	188
2173	1	8	99	2	188
2173	1	8	99	2	188
2173	1	8	99	5	188
2173	1	8	99	6	188
2173	1	8	99	7	188
2173	0	7	99	3	135
2176	1	7	2564	7	161
2176	0	7	99	1	187
2176	0	7	99	4	187
2180	1	8	2078	2	1
2180	1	8	99	5	149
2180	0	7	2090	5	400
2180	1	7	3293	9	32
2182	1	8	99	1	68
2182	1	8	99	4	157
2182	0	8	99	3	357
2182	0	8	3220	4	408
2182	1	8	2125	5	428
2182	0	8	2311	7	437
2182	1	8	2566	1	34
2182	1	8	3135	4	42
2182	1	8	2310	1	160
2182	1	8	2310	1	160
2182	0	8	2246	2	177
2182	1	8	3233	2	202
2182	1	8	3233	2	202
2182	0	8	3084	7	210
2182	0	8	2323	9	213
2182	1	8	99	2	291
2182	1	8	99	2	291
2182	1	8	2632	3	297
2182	1	8	2547	1	298
2182	1	8	2547	9	298
2182	1	8	3253	5	320
2182	0	8	99	7	324
2182	0	8	99	9	371
2182	1	8	2665	4	395
2182	0	7	99	7	100
2182	0	7	99	7	107
2182	1	7	3235	6	137
2182	1	7	99	6	175
2182	0	7	99	7	303
2182	1	7	99	7	393
2183	0	8	3015	1	113
2183	0	8	99	1	201
2183	0	8	2477	1	368
2183	0	8	99	9	405
2183	0	8	99	9	329
2183	0	8	99	9	366
2185	0	8	3164	9	193
2185	0	8	2335	9	341
2185	0	7	2092	5	2
2185	0	7	2628	1	146
2185	0	7	3283	2	301
2185	0	7	99	7	415
2185	0	7	2265	2	417
2185	0	7	3380	2	419
2185	0	7	2420	5	435
2185	0	7	99	4	439
2185	0	7	99	9	439
2185	0	7	3082	9	82
2185	1	7	3427	3	102
2185	0	7	99	4	104
2185	0	7	99	4	110
2185	0	7	99	3	116
2185	1	7	99	2	131
2185	0	7	99	7	176
2185	0	7	99	7	177
2185	1	7	3169	7	219
2185	0	7	2460	1	241
2185	0	7	3387	7	271
2185	0	7	2565	9	283
2185	0	7	3420	9	320
2185	0	7	99	9	386
2185	0	7	99	3	394
2189	0	8	99	1	203
2189	1	8	99	1	284
2190	0	8	2171	7	2
2190	0	8	2171	9	2
2190	1	8	99	1	446
2190	1	8	99	2	446
2190	99	8	99	1	132
2190	99	8	99	2	132
2190	0	8	2168	3	218
2190	1	8	99	3	230
2190	0	8	99	3	275
2191	1	8	99	1	57
2191	1	8	99	9	124
2191	0	8	2452	9	246
2191	1	8	99	3	401
2191	0	8	3220	1	408
2191	1	8	2461	1	12
2191	1	8	2461	7	12
2191	1	8	3135	5	42
2191	1	8	2526	7	61
2191	0	8	2159	5	71
2191	0	8	3108	3	96
2191	0	8	3282	9	116
2191	0	8	99	5	117
2191	1	8	2600	3	126
2191	1	8	2093	1	132
2191	1	8	2093	7	132
2191	1	8	2268	7	164
2191	1	8	2475	1	182
2191	1	8	2475	7	182
2191	1	8	99	1	188
2191	1	8	99	7	188
2191	0	8	2466	2	287
2191	0	8	3089	6	295
2191	0	8	99	1	362
2191	0	8	99	6	362
2191	1	7	3329	3	434
2192	0	8	99	1	68
2192	0	8	2661	2	157
2192	0	8	2452	3	246
2192	0	8	2398	2	323
2192	0	8	2340	1	346
2192	1	8	99	3	401
2192	0	8	99	1	434
2192	0	8	99	1	434
2192	0	8	2311	3	437
2192	0	8	2607	3	440
2192	1	8	2347	3	17
2192	0	8	2627	2	33
2192	0	8	2331	4	39
2192	1	8	99	4	59
2192	1	8	99	3	63
2192	1	8	99	3	63
2192	0	8	99	2	117
2192	0	8	3257	3	131
2192	1	8	3136	1	324
2192	0	7	99	4	171
2193	1	8	99	2	400
2193	0	8	99	5	400
2193	0	8	99	9	68
2193	1	8	99	3	168
2193	0	8	99	6	407
2193	0	8	2331	9	39
2193	0	8	2200	1	40
2193	0	8	2159	6	71
2193	0	8	3108	1	96
2193	0	8	3108	3	96
2193	0	8	2504	2	118
2193	1	8	3209	5	228
2193	1	8	99	6	284
2193	1	7	3139	3	76
2193	1	7	99	3	285
2193	0	7	3261	3	329
2195	1	7	99	2	448
2195	1	7	99	2	448
2195	1	7	99	9	448
2195	1	7	99	9	448
2195	1	7	2267	4	70
2195	0	7	99	7	95
2195	1	7	2386	2	96
2195	1	7	99	2	132
2195	1	7	99	2	132
2195	0	7	99	9	169
2195	1	7	99	2	175
2195	1	7	99	2	175
2195	1	7	99	2	175
2195	1	7	99	2	175
2195	1	7	99	3	175
2195	1	7	2514	9	178
2195	0	7	99	7	195
2195	1	7	99	4	237
2195	1	7	99	4	237
2195	1	7	99	4	237
2195	0	7	99	6	258
2195	0	7	99	2	267
2195	1	7	2358	2	291
2199	0	7	99	6	425
2199	1	7	99	9	41
2199	1	7	99	9	41
2199	1	7	99	7	76
2199	1	7	99	6	177
2199	1	99	99	7	285
2199	0	99	99	6	387
2199	1	8	99	3	291
2199	1	8	99	4	291
2199	1	7	99	9	400
2199	0	7	2090	3	400
2199	0	7	2090	4	400
2199	1	7	3241	9	411
2199	1	7	99	9	157
2199	1	7	3097	9	323
2199	1	7	99	5	396
2199	99	7	99	9	434
2199	1	7	99	2	453
2199	1	7	99	9	453
2199	1	7	99	9	9
2199	0	7	99	3	81
2199	0	7	99	4	81
2199	0	7	99	2	104
2199	1	7	3255	9	163
2199	1	7	99	1	176
2199	1	7	3342	3	192
2199	1	7	3342	4	192
2199	1	7	3342	9	192
2199	1	7	3350	5	226
2199	1	7	99	9	276
2199	1	7	99	5	280
2199	1	7	99	3	283
2199	1	7	99	3	283
2199	1	7	99	4	283
2199	1	7	99	4	283
2199	1	7	99	3	286
2199	1	7	99	4	286
2199	0	7	2630	5	289
2199	1	7	2053	9	310
2199	0	7	3420	3	320
2199	0	7	3420	4	320
2199	0	7	2170	5	369
2199	1	7	99	5	393
2200	0	8	99	1	411
2200	0	8	2340	4	346
2200	0	8	99	1	406
2200	0	8	2311	4	437
2200	0	8	2311	9	437
2200	0	8	2592	4	180
2200	0	8	99	1	195
2200	0	8	99	2	195
2200	1	8	3209	9	228
2200	0	8	3214	9	266
2200	0	8	99	9	296
2200	0	8	3093	4	298
2200	1	7	99	9	285
2200	1	7	2105	9	296
2201	0	8	99	3	46
2201	0	8	99	7	57
2201	0	8	99	3	94
2201	0	8	2466	3	287
2201	0	8	2466	4	287
2201	1	7	99	3	419
2201	1	7	99	4	419
2201	0	7	3380	7	419
2201	0	7	3380	9	419
2201	0	7	3059	6	425
2201	1	7	3329	6	434
2201	0	7	2395	9	434
2201	0	7	99	9	439
2201	0	7	3259	6	442
2201	0	7	3432	2	450
2201	1	7	3383	1	41
2201	1	7	3383	7	41
2201	0	7	3262	5	99
2201	1	7	99	6	104
2201	0	7	99	9	159
2201	0	7	99	9	171
2201	1	7	2514	7	178
2201	1	7	2514	9	178
2201	0	7	99	7	183
2201	0	7	99	5	210
2201	1	7	99	5	215
2201	0	7	3393	5	284
2201	1	7	99	7	294
2201	0	7	99	1	325
2201	0	7	99	5	325
2201	0	7	3425	7	359
2202	0	8	2661	2	157
2202	0	8	99	1	357
2202	0	8	2159	2	71
2202	0	8	2257	2	98
2202	0	8	99	1	104
2202	0	8	99	2	117
2211	1	8	2488	1	422
2211	1	8	99	5	124
2211	1	8	99	7	124
2211	1	8	2610	1	146
2211	0	8	2661	9	157
2211	1	8	3127	5	323
2211	0	8	99	5	407
2211	0	8	99	1	416
2211	0	8	99	7	434
2211	0	8	3016	9	3
2211	0	8	2331	1	39
2211	0	8	2650	3	110
2211	0	8	2642	7	186
2211	0	8	99	1	196
2211	0	8	2008	2	199
2211	1	8	2444	7	238
2211	1	8	99	5	344
2211	1	7	3170	9	151
2212	0	8	99	2	434
2212	0	8	2607	9	440
2212	0	8	99	3	12
2212	0	8	99	2	34
2212	0	8	99	2	97
2212	0	8	2650	2	110
2212	1	8	2268	2	164
2212	1	8	99	3	177
2212	1	8	99	3	283
2212	0	8	99	2	294
2212	1	7	99	1	334
2212	1	7	99	2	90
2212	0	7	3207	3	157
2212	0	7	99	6	431
2212	1	7	99	2	26
2212	0	7	3001	2	84
2212	1	7	99	6	167
2212	1	7	99	1	176
2212	1	7	99	6	176
2212	1	7	3443	2	206
2212	0	7	3434	3	263
2212	0	7	99	4	348
2212	0	7	2170	1	369
2212	0	7	2170	3	369
2212	0	7	2170	4	369
2212	0	7	2170	9	369
2212	1	7	2158	2	391
2212	1	7	99	5	393
2216	1	8	3253	1	320
2216	1	8	2665	1	395
2218	1	7	99	7	400
2218	0	7	2090	3	400
2218	0	7	2090	3	400
2218	0	7	2090	3	400
2218	0	7	2090	7	400
2218	1	7	99	7	57
2218	1	7	99	9	57
2218	0	7	99	1	68
2218	0	7	99	9	414
2218	0	7	99	1	431
2218	0	7	99	2	431
2218	0	7	99	2	431
2218	0	7	99	2	431
2218	0	7	2395	7	434
2218	0	7	2395	9	434
2218	0	7	2395	9	434
2218	0	7	99	2	452
2218	1	7	3085	2	77
2218	0	7	99	1	109
2218	0	7	99	2	109
2218	0	7	99	1	116
2218	0	7	99	7	116
2218	0	7	3033	2	136
2218	1	7	99	2	138
2218	1	7	99	2	138
2218	1	7	99	9	143
2218	0	7	99	7	143
2218	1	7	99	3	158
2218	1	7	99	2	175
2218	1	7	99	6	176
2218	0	7	99	7	176
2218	0	7	99	7	176
2218	0	7	99	2	187
2218	0	7	99	2	187
2218	0	7	3387	9	271
2218	1	7	99	2	276
2218	1	7	3117	6	287
2218	1	7	3117	6	287
2218	1	7	3117	7	287
2218	1	7	3117	9	287
2218	0	7	99	9	314
2218	0	7	99	1	336
2218	0	7	2227	2	367
2218	0	7	99	1	394
2218	0	7	99	7	394
2218	0	7	99	7	394
2221	0	8	3287	9	58
2221	0	8	99	9	108
2221	1	8	99	9	130
2221	1	8	99	9	184
2221	1	8	99	2	284
2221	0	8	2698	9	291
2221	1	8	99	9	340
2221	0	7	99	4	431
2221	1	7	2626	1	14
2221	0	7	99	4	109
2221	1	7	99	4	131
2221	1	7	99	4	175
2221	0	7	99	4	187
2221	1	7	3169	1	219
2221	1	7	3169	4	219
2221	0	7	99	4	315
2223	0	8	99	6	446
[truncated: 8,782 more rows]
